# Supplementary material
Source: PubMed Central journal article supplement (PMC2993868)
Supplement: NIHMS250541-supplement-2_si_002.pdf [file NIHMS250541-supplement-2_si_002.pdf]

## Supporting Information

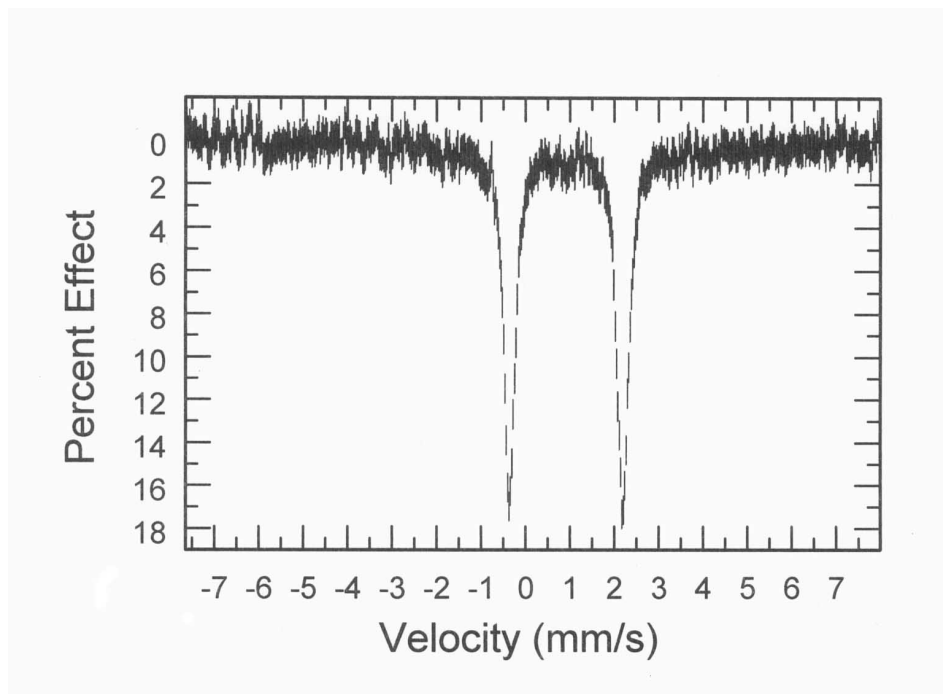

**Figure S1.** Zero-field Mössbauer spectrum of [Fe(TPP)(Hdmpz)] taken at 4.2 K. The fit parameters are: Quadrupole Splitting = 2.54 mm/s, isomer shift = 0.91 mm/s, Gamma = 0.31. Area = 16.2 %mm/s.

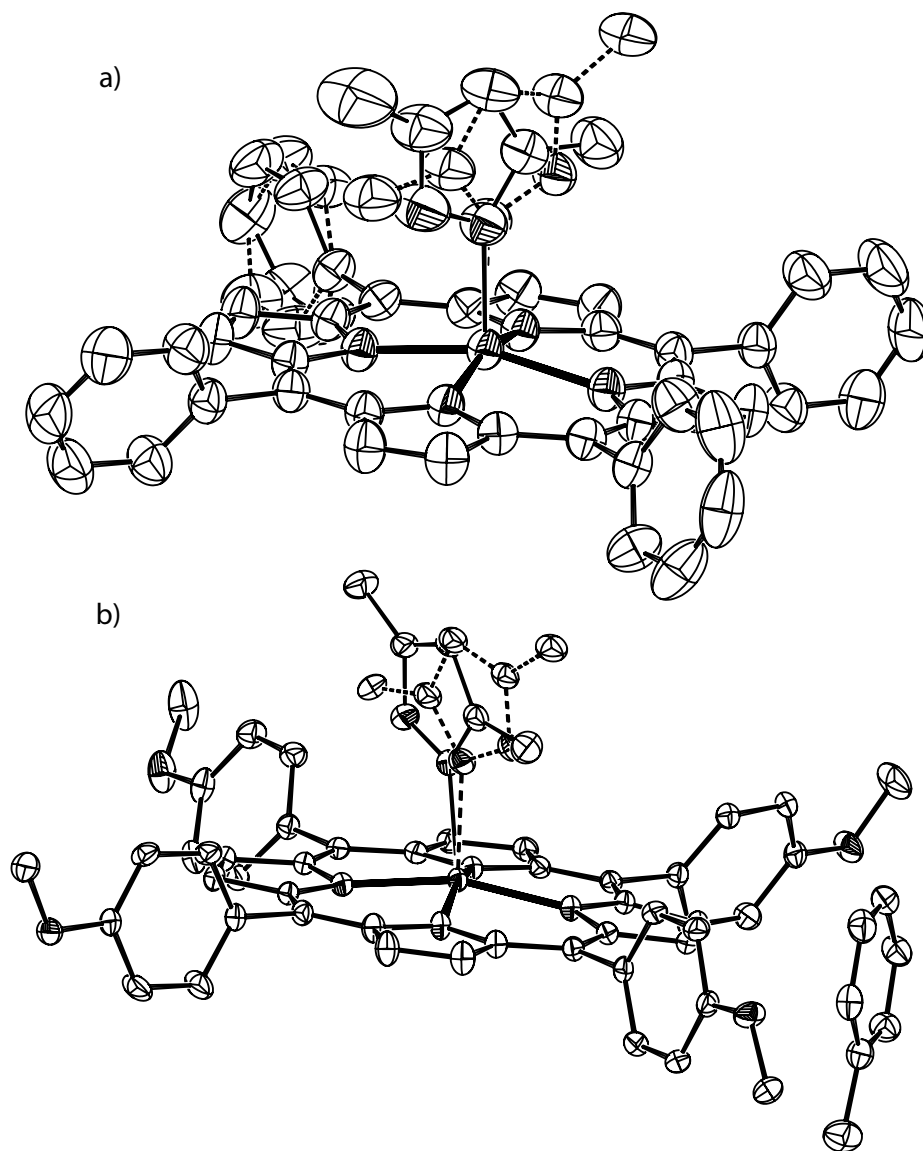

**Figure S2.** ORTEP diagram showing all nonhydrogen atoms in the independent unit including all the disordered atoms. The major pyrazole ligand orientation is drawn with heavy bonds, while the minor orientation is depicted with open bonds. Diagrams are for a) [Fe(TPP)(Hdmpz)] and b) [Fe(Tp-OCH<sub>3</sub>PP)(Hdmpz)].

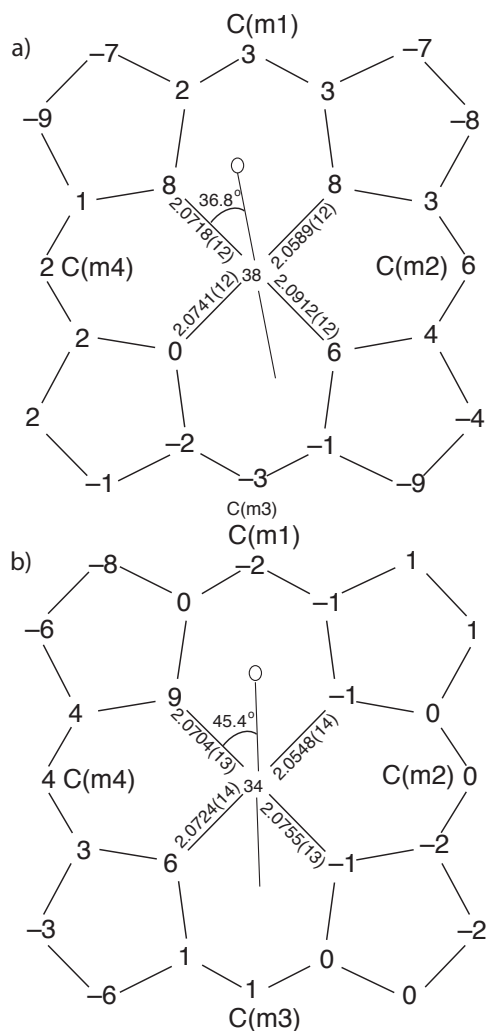

**Figure S3.** Formal diagrams of the porphyrinato cores. a) [Fe(TPP)(Hdmpz)]. b) [Fe(Tp-OCH<sub>3</sub>PP)(Hdmpz)]. Illustrated are the displacements of each atom from the mean plane of the 24-atom core in units of 0.01 Å. Positive values of displacement are toward the pyrazole ligand. The diagrams also show the orientation of the pyrazole ligand with respect to the atoms of the porphyrin core. The location of the methyl group at the α-position of the coordinated nitrogen is represented by the circle.

**Table S1.** Complete Crystallographic Details for [Fe(TPP)(Hdmpz)]

|                                                              |                                                                   |
|--------------------------------------------------------------|-------------------------------------------------------------------|
| formula                                                      | C <sub>49</sub> H <sub>36</sub> FeN <sub>6</sub>                  |
| FW, amu                                                      | 764.69                                                            |
| <i>a</i> , Å                                                 | 11.3032(2)                                                        |
| <i>b</i> , Å                                                 | 30.8656(6)                                                        |
| <i>c</i> , Å                                                 | 11.7462(2)                                                        |
| $\beta$ , deg                                                | 105.3580(10)                                                      |
| <i>V</i> , Å <sup>3</sup>                                    | 3951.67(12)                                                       |
| space group                                                  | <i>P</i> 2 <sub>1</sub> / <i>c</i>                                |
| <i>Z</i>                                                     | 4                                                                 |
| D <sub>c</sub> , g/cm <sup>3</sup>                           | 1.285                                                             |
| F(000)                                                       | 1592                                                              |
| $\mu$ , mm <sup>-1</sup>                                     | 0.424                                                             |
| crystal dimensions, mm                                       | 0.44 × 0.44 × 0.22                                                |
| radiation                                                    | MoK $\alpha$ , $\bar{\lambda}$ = 0.71073 Å                        |
| temperature, K                                               | 299(2)                                                            |
| diffractometer                                               | Bruker Apex CCD                                                   |
| $\theta$ range for collected data, deg                       | 1.32–30.50                                                        |
| index range                                                  | –16 ≤ <i>h</i> ≤ 16<br>–44 ≤ <i>k</i> ≤ 43<br>–16 ≤ <i>l</i> ≤ 15 |
| total data collected                                         | 84805                                                             |
| absorption correction                                        | Semi-empirical from equivalent                                    |
| relative transmission coefficients (I)                       | 0.9124 and 0.8352                                                 |
| unique data                                                  | 11989 ( <i>R</i> <sub>int</sub> = 0.024)                          |
| unique observed data [ <i>I</i> > 2 $\sigma$ ( <i>I</i> )]   | 8806                                                              |
| refinement method                                            | Full-matrix least-squares on F <sup>2</sup>                       |
| data/restraints/parameters                                   | 11989/84/582                                                      |
| goodness-of-fit (based on <i>F</i> <sup>2</sup> )            | 1.025                                                             |
| final <i>R</i> indices [ <i>I</i> > 2 $\sigma$ ( <i>I</i> )] | <i>R</i> <sub>1</sub> = 0.0421, <i>wR</i> <sub>2</sub> = 0.1121   |
| final <i>R</i> indices (all data)                            | <i>R</i> <sub>1</sub> = 0.0645, <i>wR</i> <sub>2</sub> = 0.1272   |

**Table S2.** Atomic Coordinates and Equivalent Isotropic Displacement Parameters ( $\text{\AA}^2$ ) for  $[\text{Fe}(\text{TPP})(\text{Hdmpz})]^a$

| atom  | $x$          | $y$         | $z$         | $U(\text{eq})$ |
|-------|--------------|-------------|-------------|----------------|
| Fe(1) | 0.37554(2)   | 0.13193(1)  | 0.80577(2)  | 0.0377(1)      |
| N(1)  | 0.34128(12)  | 0.19179(4)  | 0.87026(11) | 0.0401(3)      |
| N(2)  | 0.26137(11)  | 0.10397(4)  | 0.89542(11) | 0.0408(3)      |
| N(3)  | 0.44794(11)  | 0.07058(4)  | 0.78972(11) | 0.0398(3)      |
| N(4)  | 0.53049(12)  | 0.15819(4)  | 0.76945(11) | 0.0410(3)      |
| C(a1) | 0.39624(15)  | 0.23049(5)  | 0.85671(13) | 0.0416(3)      |
| C(a2) | 0.25196(14)  | 0.20092(5)  | 0.92674(13) | 0.0411(3)      |
| C(a3) | 0.18342(14)  | 0.12552(5)  | 0.94834(13) | 0.0426(3)      |
| C(a4) | 0.23978(14)  | 0.06045(5)  | 0.90426(13) | 0.0423(3)      |
| C(a5) | 0.39836(14)  | 0.03178(5)  | 0.81108(13) | 0.0421(3)      |
| C(a6) | 0.54445(14)  | 0.06096(5)  | 0.74392(14) | 0.0417(3)      |
| C(a7) | 0.61351(14)  | 0.13666(5)  | 0.72284(14) | 0.0413(3)      |
| C(a8) | 0.55364(14)  | 0.20167(5)  | 0.76345(13) | 0.0416(3)      |
| C(b1) | 0.33859(17)  | 0.26500(5)  | 0.90556(15) | 0.0510(4)      |
| C(b2) | 0.25036(16)  | 0.24705(5)  | 0.94795(15) | 0.0502(4)      |
| C(b3) | 0.11171(16)  | 0.09419(6)  | 0.99230(16) | 0.0520(4)      |
| C(b4) | 0.14653(17)  | 0.05446(6)  | 0.96570(16) | 0.0532(4)      |
| C(b5) | 0.46630(16)  | -0.00326(5) | 0.77686(16) | 0.0524(4)      |
| C(b6) | 0.55624(17)  | 0.01468(5)  | 0.73651(17) | 0.0532(4)      |
| C(b7) | 0.69069(16)  | 0.16798(5)  | 0.68641(16) | 0.0515(4)      |
| C(b8) | 0.65357(16)  | 0.20762(5)  | 0.71122(16) | 0.0521(4)      |
| C(m1) | 0.17640(14)  | 0.17046(5)  | 0.96081(13) | 0.0419(3)      |
| C(m2) | 0.29977(14)  | 0.02675(5)  | 0.86153(13) | 0.0414(3)      |
| C(m3) | 0.62114(13)  | 0.09175(5)  | 0.71045(13) | 0.0411(3)      |
| C(m4) | 0.49243(15)  | 0.23556(5)  | 0.80410(13) | 0.0416(3)      |
| C(11) | 0.08060(14)  | 0.18753(5)  | 1.01613(14) | 0.0451(3)      |
| C(12) | -0.03830(18) | 0.19285(8)  | 0.95014(19) | 0.0696(5)      |
| C(13) | -0.1267(2)   | 0.20888(9)  | 1.0008(2)   | 0.0864(7)      |
| C(14) | -0.0969(2)   | 0.21976(7)  | 1.1170(2)   | 0.0745(6)      |
| C(15) | 0.0195(2)    | 0.21462(7)  | 1.18401(19) | 0.0702(5)      |
| C(16) | 0.10903(18)  | 0.19863(7)  | 1.13417(16) | 0.0587(4)      |
| C(21) | 0.25262(15)  | -0.01810(5) | 0.86940(14) | 0.0446(3)      |
| C(22) | 0.3145(2)    | -0.04770(6) | 0.95325(17) | 0.0617(5)      |
| C(23) | 0.2661(3)    | -0.08849(6) | 0.9587(2)   | 0.0784(7)      |

**Table S2.** Continued

| atom   | $x$         | $y$         | $z$         | $U(\text{eq})$ |
|--------|-------------|-------------|-------------|----------------|
| C(24)  | 0.1581(3)   | -0.10045(7) | 0.8815(3)   | 0.0835(8)      |
| C(25)  | 0.0970(2)   | -0.07162(8) | 0.7986(3)   | 0.0854(7)      |
| C(26)  | 0.14318(18) | -0.03063(6) | 0.79252(19) | 0.0631(5)      |
| C(31)  | 0.71980(15) | 0.07494(5)  | 0.65826(14) | 0.0457(3)      |
| C(32)  | 0.84223(17) | 0.07982(6)  | 0.71733(18) | 0.0593(4)      |
| C(33)  | 0.93326(19) | 0.06638(7)  | 0.6656(2)   | 0.0726(6)      |
| C(34)  | 0.9033(2)   | 0.04777(8)  | 0.5566(2)   | 0.0780(6)      |
| C(35)  | 0.7820(2)   | 0.04155(8)  | 0.4980(2)   | 0.0775(6)      |
| C(36)  | 0.69003(19) | 0.05493(7)  | 0.54834(17) | 0.0608(4)      |
| C(41)  | 0.53593(15) | 0.28079(5)  | 0.79119(14) | 0.0447(3)      |
| C(44)  | 0.6175(3)   | 0.36439(6)  | 0.7663(2)   | 0.0731(6)      |
| C(42a) | 0.5985(12)  | 0.3029(4)   | 0.8859(10)  | 0.061(2)       |
| C(43a) | 0.6364(13)  | 0.3439(4)   | 0.8718(11)  | 0.074(3)       |
| C(45a) | 0.5516(13)  | 0.3412(4)   | 0.6692(11)  | 0.071(2)       |
| C(46a) | 0.5069(12)  | 0.2990(3)   | 0.6789(9)   | 0.0570(19)     |
| C(42b) | 0.6393(15)  | 0.2988(4)   | 0.8738(13)  | 0.070(3)       |
| C(43b) | 0.6819(15)  | 0.3413(5)   | 0.8637(14)  | 0.077(3)       |
| C(45b) | 0.5188(15)  | 0.3488(5)   | 0.6865(15)  | 0.079(3)       |
| C(46b) | 0.4828(14)  | 0.3081(5)   | 0.6994(13)  | 0.067(3)       |
| N(5a)  | 0.26399(18) | 0.13177(7)  | 0.62618(16) | 0.0529(4)      |
| N(6a)  | 0.31368(19) | 0.11241(7)  | 0.54559(16) | 0.0751(6)      |
| C(1a)  | 0.2423(2)   | 0.11517(9)  | 0.43556(19) | 0.0738(7)      |
| C(2a)  | 0.1404(3)   | 0.13674(9)  | 0.4444(2)   | 0.0652(5)      |
| C(3a)  | 0.15735(18) | 0.14662(6)  | 0.56350(18) | 0.0517(4)      |
| C(4a)  | 0.2815(4)   | 0.09584(15) | 0.3335(3)   | 0.1307(16)     |
| C(5a)  | 0.0752(2)   | 0.17118(8)  | 0.6204(2)   | 0.0734(6)      |
| N(5b)  | 0.2573(13)  | 0.1366(7)   | 0.6287(11)  | 0.0529(4)      |
| N(6b)  | 0.1462(13)  | 0.1555(6)   | 0.6216(10)  | 0.050(2)       |
| C(1b)  | 0.0718(11)  | 0.1552(4)   | 0.5125(10)  | 0.057(2)       |
| C(2b)  | 0.1366(14)  | 0.1360(7)   | 0.4437(10)  | 0.0652(5)      |
| C(3b)  | 0.2518(12)  | 0.1247(5)   | 0.5199(12)  | 0.059(2)       |
| C(4b)  | -0.0568(13) | 0.1743(7)   | 0.4867(16)  | 0.069(5)       |
| C(5b)  | 0.3570(15)  | 0.1015(7)   | 0.4913(18)  | 0.071(5)       |

<sup>a</sup> $U(\text{eq})$  is defined as one third of the trace of the orthogonalized  $\mathbf{U}_{ij}$  tensor. The estimated standard deviations of the least significant digits are given in parentheses.

**Table S3.** Bond Lengths for [Fe(TPP)(Hdmpz)]<sup>a</sup>

| bond        | length (Å) | bond          | length (Å) |
|-------------|------------|---------------|------------|
| Fe(1)–N(2)  | 2.0589(12) | C(25)–H(25)   | 0.9300     |
| Fe(1)–N(1)  | 2.0718(12) | C(26)–H(26)   | 0.9300     |
| Fe(1)–N(4)  | 2.0741(12) | C(31)–C(32)   | 1.382(3)   |
| Fe(1)–N(3)  | 2.0912(12) | C(31)–C(36)   | 1.390(2)   |
| Fe(1)–N(5a) | 2.1519(18) | C(32)–C(33)   | 1.389(3)   |
| Fe(1)–N(5b) | 2.159(11)  | C(32)–H(32)   | 0.9300     |
| N(1)–C(a1)  | 1.3750(19) | C(33)–C(34)   | 1.363(3)   |
| N(1)–C(a2)  | 1.3761(19) | C(33)–H(33)   | 0.9300     |
| N(2)–C(a4)  | 1.3739(19) | C(34)–C(35)   | 1.375(3)   |
| N(2)–C(a3)  | 1.3767(19) | C(34)–H(34)   | 0.9300     |
| N(3)–C(a6)  | 1.3706(19) | C(35)–C(36)   | 1.388(3)   |
| N(3)–C(a5)  | 1.3733(19) | C(35)–H(35)   | 0.9300     |
| N(4)–C(a8)  | 1.3728(19) | C(36)–H(36)   | 0.9300     |
| N(4)–C(a7)  | 1.3762(19) | C(41)–C(42a)  | 1.336(11)  |
| C(a1)–C(m4) | 1.394(2)   | C(41)–C(46b)  | 1.374(14)  |
| C(a1)–C(b1) | 1.444(2)   | C(41)–C(46a)  | 1.390(11)  |
| C(a2)–C(m1) | 1.398(2)   | C(41)–C(42b)  | 1.419(15)  |
| C(a2)–C(b2) | 1.446(2)   | C(44)–C(45b)  | 1.342(17)  |
| C(a3)–C(m1) | 1.399(2)   | C(44)–C(43a)  | 1.356(13)  |
| C(a3)–C(b3) | 1.442(2)   | C(44)–C(43b)  | 1.381(16)  |
| C(a4)–C(m2) | 1.405(2)   | C(44)–C(45a)  | 1.385(14)  |
| C(a4)–C(b4) | 1.438(2)   | C(44)–H(44)   | 0.9300     |
| C(a5)–C(m2) | 1.402(2)   | C(42a)–C(43a) | 1.361(16)  |
| C(a5)–C(b5) | 1.444(2)   | C(42a)–H(42a) | 0.9300     |
| C(a6)–C(m3) | 1.411(2)   | C(43a)–H(43a) | 0.9300     |
| C(a6)–C(b6) | 1.440(2)   | C(45a)–C(46a) | 1.413(16)  |
| C(a7)–C(m3) | 1.399(2)   | C(45a)–H(45a) | 0.9300     |
| C(a7)–C(b7) | 1.441(2)   | C(46a)–H(46a) | 0.9300     |
| C(a8)–C(m4) | 1.406(2)   | C(42b)–C(43b) | 1.413(18)  |
| C(a8)–C(b8) | 1.433(2)   | C(42b)–H(42b) | 0.9300     |
| C(b1)–C(b2) | 1.346(2)   | C(43b)–H(43b) | 0.9300     |
| C(b1)–H(b1) | 0.9300     | C(45b)–C(46b) | 1.34(2)    |
| C(b2)–H(b2) | 0.9300     | C(45b)–H(45b) | 0.9300     |
| C(b3)–C(b4) | 1.349(2)   | C(46b)–H(46b) | 0.9300     |

**Table S3.** Continued

| bond        | length (Å) | bond         | length (Å) |
|-------------|------------|--------------|------------|
| C(b3)–H(b3) | 0.9300     | N(5a)–C(3a)  | 1.317(3)   |
| C(b4)–H(b4) | 0.9300     | N(5a)–N(6a)  | 1.360(3)   |
| C(b5)–C(b6) | 1.349(2)   | N(6a)–C(1a)  | 1.333(3)   |
| C(b5)–H(b5) | 0.9300     | N(6a)–H(6aa) | 0.8600     |
| C(b6)–H(b6) | 0.9300     | C(1a)–C(2a)  | 1.357(4)   |
| C(b7)–C(b8) | 1.350(2)   | C(1a)–C(4a)  | 1.507(4)   |
| C(b7)–H(b7) | 0.9300     | C(2a)–C(3a)  | 1.395(3)   |
| C(b8)–H(b8) | 0.9300     | C(2a)–H(2aa) | 0.9300     |
| C(m1)–C(11) | 1.498(2)   | C(3a)–C(5a)  | 1.488(3)   |
| C(m2)–C(21) | 1.495(2)   | C(4a)–H(4aa) | 0.9600     |
| C(m3)–C(31) | 1.500(2)   | C(4a)–H(4ab) | 0.9600     |
| C(m4)–C(41) | 1.501(2)   | C(4a)–H(4ac) | 0.9600     |
| C(11)–C(12) | 1.372(3)   | C(5a)–H(5aa) | 0.9600     |
| C(11)–C(16) | 1.381(2)   | C(5a)–H(5ab) | 0.9600     |
| C(12)–C(13) | 1.383(3)   | C(5a)–H(5ac) | 0.9600     |
| C(12)–H(12) | 0.9300     | N(5b)–C(3b)  | 1.3145     |
| C(13)–C(14) | 1.358(3)   | N(5b)–N(6b)  | 1.3676     |
| C(13)–H(13) | 0.9300     | N(6b)–C(1b)  | 1.3338     |
| C(14)–C(15) | 1.352(3)   | N(6b)–H(6ba) | 0.8600     |
| C(14)–H(14) | 0.9300     | C(1b)–C(2b)  | 1.3622     |
| C(15)–C(16) | 1.387(3)   | C(1b)–C(4b)  | 1.5225     |
| C(15)–H(15) | 0.9300     | C(2b)–C(3b)  | 1.4143     |
| C(16)–H(16) | 0.9300     | C(2b)–H(2ba) | 0.9300     |
| C(21)–C(26) | 1.380(2)   | C(3b)–C(5b)  | 1.5008     |
| C(21)–C(22) | 1.389(2)   | C(4b)–H(4ba) | 0.9600     |
| C(22)–C(23) | 1.381(3)   | C(4b)–H(4bb) | 0.9600     |
| C(22)–H(22) | 0.9300     | C(4b)–H(4bc) | 0.9600     |
| C(23)–C(24) | 1.365(4)   | C(5b)–H(5ba) | 0.9600     |
| C(23)–H(23) | 0.9300     | C(5b)–H(5bb) | 0.9600     |
| C(24)–C(25) | 1.364(4)   | C(5b)–H(5bc) | 0.9600     |
| C(24)–H(24) | 0.9300     |              |            |
| C(25)–C(26) | 1.378(3)   |              |            |

<sup>a</sup>The estimated standard deviations of the least significant digits are given in parentheses.



**Table S4.** Bond Angles for [Fe(TPP)(Hdmpz)]<sup>a</sup>

| angle             | degree     | angle               | degree     |
|-------------------|------------|---------------------|------------|
| N(2)–Fe(1)–N(1)   | 89.07(5)   | C(24)–C(23)–H(23)   | 119.6      |
| N(2)–Fe(1)–N(4)   | 161.22(5)  | C(22)–C(23)–H(23)   | 119.6      |
| N(1)–Fe(1)–N(4)   | 88.66(5)   | C(25)–C(24)–C(23)   | 119.51(19) |
| N(2)–Fe(1)–N(3)   | 88.84(5)   | C(25)–C(24)–H(24)   | 120.2      |
| N(1)–Fe(1)–N(3)   | 162.93(5)  | C(23)–C(24)–H(24)   | 120.2      |
| N(4)–Fe(1)–N(3)   | 87.90(5)   | C(24)–C(25)–C(26)   | 120.6(2)   |
| N(2)–Fe(1)–N(5a)  | 102.50(7)  | C(24)–C(25)–H(25)   | 119.7      |
| N(1)–Fe(1)–N(5a)  | 104.05(6)  | C(26)–C(25)–H(25)   | 119.7      |
| N(4)–Fe(1)–N(5a)  | 96.13(7)   | C(25)–C(26)–C(21)   | 120.7(2)   |
| N(3)–Fe(1)–N(5a)  | 92.94(6)   | C(25)–C(26)–H(26)   | 119.7      |
| N(2)–Fe(1)–N(5b)  | 102.0(5)   | C(21)–C(26)–H(26)   | 119.7      |
| N(1)–Fe(1)–N(5b)  | 99.5(5)    | C(32)–C(31)–C(36)   | 118.59(16) |
| N(4)–Fe(1)–N(5b)  | 96.7(5)    | C(32)–C(31)–C(m3)   | 120.73(15) |
| N(3)–Fe(1)–N(5b)  | 97.5(5)    | C(36)–C(31)–C(m3)   | 120.66(15) |
| N(5a)–Fe(1)–N(5b) | 4.6(5)     | C(31)–C(32)–C(33)   | 120.47(19) |
| C(a1)–N(1)–C(a2)  | 106.83(12) | C(31)–C(32)–H(32)   | 119.8      |
| C(a1)–N(1)–Fe(1)  | 126.76(10) | C(33)–C(32)–H(32)   | 119.8      |
| C(a2)–N(1)–Fe(1)  | 126.23(10) | C(34)–C(33)–C(32)   | 120.5(2)   |
| C(a4)–N(2)–C(a3)  | 106.89(12) | C(34)–C(33)–H(33)   | 119.7      |
| C(a4)–N(2)–Fe(1)  | 126.61(10) | C(32)–C(33)–H(33)   | 119.7      |
| C(a3)–N(2)–Fe(1)  | 126.24(10) | C(33)–C(34)–C(35)   | 119.77(19) |
| C(a6)–N(3)–C(a5)  | 106.77(12) | C(33)–C(34)–H(34)   | 120.1      |
| C(a6)–N(3)–Fe(1)  | 127.06(10) | C(35)–C(34)–H(34)   | 120.1      |
| C(a5)–N(3)–Fe(1)  | 125.80(10) | C(34)–C(35)–C(36)   | 120.3(2)   |
| C(a8)–N(4)–C(a7)  | 107.00(12) | C(34)–C(35)–H(35)   | 119.8      |
| C(a8)–N(4)–Fe(1)  | 125.12(10) | C(36)–C(35)–H(35)   | 119.8      |
| C(a7)–N(4)–Fe(1)  | 126.52(10) | C(35)–C(36)–C(31)   | 120.25(19) |
| N(1)–C(a1)–C(m4)  | 125.31(13) | C(35)–C(36)–H(36)   | 119.9      |
| N(1)–C(a1)–C(b1)  | 109.24(13) | C(31)–C(36)–H(36)   | 119.9      |
| C(m4)–C(a1)–C(b1) | 125.45(14) | C(42a)–C(41)–C(46b) | 111.5(7)   |
| N(1)–C(a2)–C(m1)  | 125.59(13) | C(42a)–C(41)–C(46a) | 121.6(7)   |
| N(1)–C(a2)–C(b2)  | 109.21(13) | C(46b)–C(41)–C(42b) | 114.0(8)   |
| C(m1)–C(a2)–C(b2) | 125.19(14) | C(46a)–C(41)–C(42b) | 115.8(8)   |
| N(2)–C(a3)–C(m1)  | 125.95(14) | C(42a)–C(41)–C(m4)  | 120.4(5)   |

**Table S4.** Continued

| angle             | degree     | angle                | degree    |
|-------------------|------------|----------------------|-----------|
| N(2)–C(a3)–C(b3)  | 108.97(13) | C(46b)–C(41)–C(m4)   | 124.2(6)  |
| C(m1)–C(a3)–C(b3) | 125.06(14) | C(46a)–C(41)–C(m4)   | 118.0(5)  |
| N(2)–C(a4)–C(m2)  | 125.78(13) | C(42b)–C(41)–C(m4)   | 121.8(5)  |
| N(2)–C(a4)–C(b4)  | 109.39(13) | C(45b)–C(44)–C(43a)  | 111.8(7)  |
| C(m2)–C(a4)–C(b4) | 124.83(14) | C(45b)–C(44)–C(43b)  | 123.4(8)  |
| N(3)–C(a5)–C(m2)  | 125.59(13) | C(43a)–C(44)–C(45a)  | 115.6(7)  |
| N(3)–C(a5)–C(b5)  | 109.24(13) | C(43b)–C(44)–C(45a)  | 117.7(8)  |
| C(m2)–C(a5)–C(b5) | 125.14(14) | C(45b)–C(44)–H(44)   | 121.4     |
| N(3)–C(a6)–C(m3)  | 125.11(13) | C(43a)–C(44)–H(44)   | 122.2     |
| N(3)–C(a6)–C(b6)  | 109.56(13) | C(43b)–C(44)–H(44)   | 115.1     |
| C(m3)–C(a6)–C(b6) | 125.33(14) | C(45a)–C(44)–H(44)   | 122.2     |
| N(4)–C(a7)–C(m3)  | 125.96(13) | C(41)–C(42a)–C(43a)  | 119.2(10) |
| N(4)–C(a7)–C(b7)  | 108.93(13) | C(41)–C(42a)–H(42a)  | 120.4     |
| C(m3)–C(a7)–C(b7) | 125.10(14) | C(43a)–C(42a)–H(42a) | 120.4     |
| N(4)–C(a8)–C(m4)  | 126.33(13) | C(44)–C(43a)–C(42a)  | 124.5(9)  |
| N(4)–C(a8)–C(b8)  | 109.26(13) | C(44)–C(43a)–H(43a)  | 117.7     |
| C(m4)–C(a8)–C(b8) | 124.39(14) | C(42a)–C(43a)–H(43a) | 117.7     |
| C(b2)–C(b1)–C(a1) | 107.43(14) | C(44)–C(45a)–C(46a)  | 122.4(10) |
| C(b2)–C(b1)–H(b1) | 126.3      | C(44)–C(45a)–H(45a)  | 118.8     |
| C(a1)–C(b1)–H(b1) | 126.3      | C(46a)–C(45a)–H(45a) | 118.8     |
| C(b1)–C(b2)–C(a2) | 107.29(14) | C(41)–C(46a)–C(45a)  | 116.7(9)  |
| C(b1)–C(b2)–H(b2) | 126.4      | C(41)–C(46a)–H(46a)  | 121.6     |
| C(a2)–C(b2)–H(b2) | 126.4      | C(45a)–C(46a)–H(46a) | 121.6     |
| C(b4)–C(b3)–C(a3) | 107.48(14) | C(43b)–C(42b)–C(41)  | 122.9(11) |
| C(b4)–C(b3)–H(b3) | 126.3      | C(43b)–C(42b)–H(42b) | 118.6     |
| C(a3)–C(b3)–H(b3) | 126.3      | C(41)–C(42b)–H(42b)  | 118.6     |
| C(b3)–C(b4)–C(a4) | 107.27(14) | C(44)–C(43b)–C(42b)  | 115.6(11) |
| C(b3)–C(b4)–H(b4) | 126.4      | C(44)–C(43b)–H(43b)  | 122.2     |
| C(a4)–C(b4)–H(b4) | 126.4      | C(42b)–C(43b)–H(43b) | 122.2     |
| C(b6)–C(b5)–C(a5) | 107.23(14) | C(46b)–C(45b)–C(44)  | 118.6(12) |
| C(b6)–C(b5)–H(b5) | 126.4      | C(46b)–C(45b)–H(45b) | 120.7     |
| C(a5)–C(b5)–H(b5) | 126.4      | C(44)–C(45b)–H(45b)  | 120.7     |
| C(b5)–C(b6)–C(a6) | 107.19(14) | C(45b)–C(46b)–C(41)  | 125.4(13) |
| C(b5)–C(b6)–H(b6) | 126.4      | C(45b)–C(46b)–H(46b) | 117.3     |

**Table S4.** Continued

| angle             | degree     | angle               | degree     |
|-------------------|------------|---------------------|------------|
| C(a6)–C(b6)–H(b6) | 126.4      | C(41)–C(46b)–H(46b) | 117.3      |
| C(b8)–C(b7)–C(a7) | 107.26(14) | C(3a)–N(5a)–N(6a)   | 104.43(18) |
| C(b8)–C(b7)–H(b7) | 126.4      | C(3a)–N(5a)–Fe(1)   | 139.38(16) |
| C(a7)–C(b7)–H(b7) | 126.4      | N(6a)–N(5a)–Fe(1)   | 116.14(14) |
| C(b7)–C(b8)–C(a8) | 107.55(14) | C(1a)–N(6a)–N(5a)   | 113.0(2)   |
| C(b7)–C(b8)–H(b8) | 126.2      | C(1a)–N(6a)–H(6aa)  | 123.5      |
| C(a8)–C(b8)–H(b8) | 126.2      | N(5a)–N(6a)–H(6aa)  | 123.5      |
| C(a2)–C(m1)–C(a3) | 125.51(13) | N(6a)–C(1a)–C(2a)   | 105.4(2)   |
| C(a2)–C(m1)–C(11) | 117.00(13) | N(6a)–C(1a)–C(4a)   | 121.1(2)   |
| C(a3)–C(m1)–C(11) | 117.48(13) | C(2a)–C(1a)–C(4a)   | 133.5(2)   |
| C(a5)–C(m2)–C(a4) | 125.57(14) | C(1a)–C(2a)–C(3a)   | 106.9(2)   |
| C(a5)–C(m2)–C(21) | 117.69(13) | C(1a)–C(2a)–H(2aa)  | 126.6      |
| C(a4)–C(m2)–C(21) | 116.73(13) | C(3a)–C(2a)–H(2aa)  | 126.6      |
| C(a7)–C(m3)–C(a6) | 125.40(13) | N(5a)–C(3a)–C(2a)   | 110.3(2)   |
| C(a7)–C(m3)–C(31) | 117.27(13) | N(5a)–C(3a)–C(5a)   | 120.9(2)   |
| C(a6)–C(m3)–C(31) | 117.32(13) | C(2a)–C(3a)–C(5a)   | 128.7(2)   |
| C(a1)–C(m4)–C(a8) | 125.36(13) | C(3b)–N(5b)–N(6b)   | 104.7      |
| C(a1)–C(m4)–C(41) | 117.64(13) | C(3b)–N(5b)–Fe(1)   | 140.9(6)   |
| C(a8)–C(m4)–C(41) | 116.99(13) | N(6b)–N(5b)–Fe(1)   | 114.3(6)   |
| C(12)–C(11)–C(16) | 118.05(16) | C(1b)–N(6b)–N(5b)   | 113.0      |
| C(12)–C(11)–C(m1) | 120.62(15) | C(1b)–N(6b)–H(6ba)  | 123.5      |
| C(16)–C(11)–C(m1) | 121.32(15) | N(5b)–N(6b)–H(6ba)  | 123.5      |
| C(11)–C(12)–C(13) | 120.7(2)   | N(6b)–C(1b)–C(2b)   | 105.8      |
| C(11)–C(12)–H(12) | 119.6      | N(6b)–C(1b)–C(4b)   | 120.9      |
| C(13)–C(12)–H(12) | 119.6      | C(2b)–C(1b)–C(4b)   | 133.3      |
| C(14)–C(13)–C(12) | 120.4(2)   | C(1b)–C(2b)–C(3b)   | 106.3      |
| C(14)–C(13)–H(13) | 119.8      | C(1b)–C(2b)–H(2ba)  | 126.8      |
| C(12)–C(13)–H(13) | 119.8      | C(3b)–C(2b)–H(2ba)  | 126.8      |
| C(15)–C(14)–C(13) | 120.00(18) | N(5b)–C(3b)–C(2b)   | 110.2      |
| C(15)–C(14)–H(14) | 120.0      | N(5b)–C(3b)–C(5b)   | 120.9      |
| C(13)–C(14)–H(14) | 120.0      | C(2b)–C(3b)–C(5b)   | 128.8      |
| C(14)–C(15)–C(16) | 120.15(19) | C(1b)–C(4b)–H(4ba)  | 109.5      |
| C(14)–C(15)–H(15) | 119.9      | C(1b)–C(4b)–H(4bb)  | 109.5      |
| C(16)–C(15)–H(15) | 119.9      | H(4ba)–C(4b)–H(4bb) | 109.5      |

**Table S4.** Continued

| angle             | degree     | angle               | degree |
|-------------------|------------|---------------------|--------|
| C(11)–C(16)–C(15) | 120.67(18) | C(1b)–C(4b)–H(4bc)  | 109.5  |
| C(11)–C(16)–H(16) | 119.7      | H(4ba)–C(4b)–H(4bc) | 109.5  |
| C(15)–C(16)–H(16) | 119.7      | H(4bb)–C(4b)–H(4bc) | 109.5  |
| C(26)–C(21)–C(22) | 118.39(16) | C(3b)–C(5b)–H(5ba)  | 109.5  |
| C(26)–C(21)–C(m2) | 119.44(15) | C(3b)–C(5b)–H(5bb)  | 109.5  |
| C(22)–C(21)–C(m2) | 122.16(15) | H(5ba)–C(5b)–H(5bb) | 109.5  |
| C(23)–C(22)–C(21) | 120.1(2)   | C(3b)–C(5b)–H(5bc)  | 109.5  |
| C(23)–C(22)–H(22) | 119.9      | H(5ba)–C(5b)–H(5bc) | 109.5  |
| C(21)–C(22)–H(22) | 119.9      | H(5bb)–C(5b)–H(5bc) | 109.5  |
| C(24)–C(23)–C(22) | 120.8(2)   |                     |        |

<sup>a</sup>The estimated standard deviations of the least significant digits are given in parentheses.

**Table S5.** Anisotropic Displacement Parameters ( $\text{\AA}^2$ ) for  $[\text{Fe}(\text{TPP})(\text{Hdmpz})]^a$ 

| atom  | $U_{11}$   | $U_{22}$   | $U_{33}$   | $U_{23}$    | $U_{13}$   | $U_{12}$    |
|-------|------------|------------|------------|-------------|------------|-------------|
| Fe(1) | 0.0404(1)  | 0.0341(1)  | 0.0413(1)  | -0.0013(1)  | 0.0156(1)  | -0.0001(1)  |
| N(1)  | 0.0434(7)  | 0.0365(6)  | 0.0431(6)  | -0.0022(5)  | 0.0160(5)  | 0.0008(5)   |
| N(2)  | 0.0425(7)  | 0.0375(6)  | 0.0459(6)  | -0.0030(5)  | 0.0180(5)  | -0.0005(5)  |
| N(3)  | 0.0420(6)  | 0.0356(6)  | 0.0447(6)  | 0.0005(5)   | 0.0169(5)  | 0.0006(5)   |
| N(4)  | 0.0444(7)  | 0.0358(6)  | 0.0471(6)  | -0.0009(5)  | 0.0196(5)  | 0.0005(5)   |
| C(a1) | 0.0491(8)  | 0.0349(7)  | 0.0418(7)  | 0.0006(5)   | 0.0141(6)  | 0.0026(6)   |
| C(a2) | 0.0420(8)  | 0.0401(7)  | 0.0422(7)  | -0.0025(6)  | 0.0128(6)  | 0.0064(6)   |
| C(a3) | 0.0413(8)  | 0.0458(8)  | 0.0440(7)  | -0.0041(6)  | 0.0168(6)  | -0.0013(6)  |
| C(a4) | 0.0438(8)  | 0.0406(7)  | 0.0454(7)  | -0.0028(6)  | 0.0171(6)  | -0.0049(6)  |
| C(a5) | 0.0443(8)  | 0.0356(7)  | 0.0475(8)  | -0.0032(6)  | 0.0143(6)  | -0.0020(6)  |
| C(a6) | 0.0435(8)  | 0.0370(7)  | 0.0478(8)  | -0.0025(6)  | 0.0176(6)  | 0.0024(6)   |
| C(a7) | 0.0418(8)  | 0.0414(7)  | 0.0442(7)  | -0.0007(6)  | 0.0177(6)  | -0.0005(6)  |
| C(a8) | 0.0465(8)  | 0.0372(7)  | 0.0441(7)  | 0.0009(6)   | 0.0172(6)  | -0.0030(6)  |
| C(b1) | 0.0647(10) | 0.0353(7)  | 0.0577(9)  | 0.0018(6)   | 0.0242(8)  | 0.0072(7)   |
| C(b2) | 0.0581(10) | 0.0408(8)  | 0.0568(9)  | 0.0005(7)   | 0.0245(8)  | 0.0113(7)   |
| C(b3) | 0.0531(9)  | 0.0521(9)  | 0.0602(10) | -0.0077(7)  | 0.0316(8)  | -0.0073(7)  |
| C(b4) | 0.0588(10) | 0.0470(8)  | 0.0625(10) | -0.0043(7)  | 0.0312(8)  | -0.0101(7)  |
| C(b5) | 0.0586(10) | 0.0344(7)  | 0.0699(10) | -0.0072(7)  | 0.0270(8)  | -0.0020(7)  |
| C(b6) | 0.0575(10) | 0.0389(8)  | 0.0711(11) | -0.0068(7)  | 0.0309(8)  | 0.0024(7)   |
| C(b7) | 0.0537(9)  | 0.0476(8)  | 0.0630(10) | -0.0017(7)  | 0.0324(8)  | -0.0044(7)  |
| C(b8) | 0.0567(10) | 0.0434(8)  | 0.0645(10) | -0.0011(7)  | 0.0307(8)  | -0.0079(7)  |
| C(m1) | 0.0389(7)  | 0.0463(8)  | 0.0423(7)  | -0.0039(6)  | 0.0137(6)  | 0.0034(6)   |
| C(m2) | 0.0433(8)  | 0.0367(7)  | 0.0447(7)  | -0.0021(6)  | 0.0124(6)  | -0.0045(6)  |
| C(m3) | 0.0417(8)  | 0.0422(7)  | 0.0427(7)  | -0.0036(6)  | 0.0169(6)  | 0.0022(6)   |
| C(m4) | 0.0499(8)  | 0.0348(7)  | 0.0409(7)  | 0.0016(5)   | 0.0134(6)  | -0.0012(6)  |
| C(11) | 0.0437(8)  | 0.0449(8)  | 0.0510(8)  | -0.0032(6)  | 0.0199(7)  | 0.0037(6)   |
| C(12) | 0.0513(11) | 0.0958(15) | 0.0611(11) | -0.0077(10) | 0.0137(9)  | 0.0167(10)  |
| C(13) | 0.0495(11) | 0.113(2)   | 0.0978(17) | -0.0073(15) | 0.0212(11) | 0.0263(12)  |
| C(14) | 0.0686(13) | 0.0710(13) | 0.0991(16) | -0.0098(11) | 0.0489(13) | 0.0126(10)  |
| C(15) | 0.0813(15) | 0.0728(13) | 0.0689(12) | -0.0173(10) | 0.0413(11) | 0.0004(11)  |
| C(16) | 0.0538(10) | 0.0723(12) | 0.0524(9)  | -0.0111(8)  | 0.0184(8)  | 0.0052(8)   |
| C(21) | 0.0530(9)  | 0.0367(7)  | 0.0493(8)  | -0.0049(6)  | 0.0228(7)  | -0.0062(6)  |
| C(22) | 0.0834(13) | 0.0467(9)  | 0.0544(10) | 0.0033(7)   | 0.0172(9)  | -0.0043(9)  |
| C(23) | 0.129(2)   | 0.0434(9)  | 0.0796(14) | 0.0084(9)   | 0.0565(15) | -0.0008(11) |

**Table S5.** Continued

| atom   | $U_{11}$   | $U_{22}$   | $U_{33}$   | $U_{23}$    | $U_{13}$   | $U_{12}$    |
|--------|------------|------------|------------|-------------|------------|-------------|
| C(24)  | 0.1064(18) | 0.0446(10) | 0.127(2)   | -0.0200(12) | 0.0790(17) | -0.0244(12) |
| C(25)  | 0.0660(13) | 0.0664(13) | 0.130(2)   | -0.0321(14) | 0.0373(14) | -0.0286(11) |
| C(26)  | 0.0542(10) | 0.0540(10) | 0.0796(13) | -0.0088(9)  | 0.0149(9)  | -0.0090(8)  |
| C(31)  | 0.0480(9)  | 0.0428(7)  | 0.0519(8)  | 0.0000(6)   | 0.0232(7)  | 0.0038(6)   |
| C(32)  | 0.0506(10) | 0.0639(11) | 0.0655(11) | -0.0056(8)  | 0.0189(8)  | 0.0072(8)   |
| C(33)  | 0.0521(11) | 0.0748(13) | 0.0952(16) | 0.0018(12)  | 0.0270(11) | 0.0145(10)  |
| C(34)  | 0.0754(15) | 0.0821(14) | 0.0918(16) | 0.0006(12)  | 0.0488(13) | 0.0241(11)  |
| C(35)  | 0.0853(16) | 0.0905(16) | 0.0667(12) | -0.0144(11) | 0.0377(12) | 0.0179(12)  |
| C(36)  | 0.0603(11) | 0.0692(11) | 0.0566(10) | -0.0104(8)  | 0.0218(8)  | 0.0070(9)   |
| C(41)  | 0.0550(9)  | 0.0356(7)  | 0.0462(8)  | 0.0017(6)   | 0.0184(7)  | -0.0013(6)  |
| C(44)  | 0.1027(18) | 0.0411(9)  | 0.0822(14) | 0.0058(9)   | 0.0363(14) | -0.0115(10) |
| C(42a) | 0.096(6)   | 0.042(3)   | 0.042(2)   | -0.0070(18) | 0.015(4)   | -0.013(4)   |
| C(43a) | 0.100(7)   | 0.052(3)   | 0.066(3)   | -0.016(2)   | 0.017(5)   | -0.031(5)   |
| C(45a) | 0.085(7)   | 0.063(4)   | 0.063(3)   | 0.020(3)    | 0.018(4)   | -0.014(4)   |
| C(46a) | 0.077(5)   | 0.044(4)   | 0.046(2)   | 0.005(2)    | 0.009(2)   | -0.012(3)   |
| C(42b) | 0.095(8)   | 0.040(3)   | 0.063(5)   | 0.007(3)    | -0.003(4)  | -0.004(4)   |
| C(43b) | 0.087(7)   | 0.051(3)   | 0.083(5)   | 0.000(3)    | 0.005(5)   | -0.028(5)   |
| C(45b) | 0.080(6)   | 0.063(5)   | 0.091(7)   | 0.045(5)    | 0.016(4)   | 0.006(4)    |
| C(46b) | 0.069(5)   | 0.056(5)   | 0.065(6)   | 0.013(4)    | -0.004(4)  | -0.007(4)   |
| N(5a)  | 0.0537(8)  | 0.0576(9)  | 0.0456(7)  | -0.0046(6)  | 0.0100(6)  | 0.0089(7)   |
| N(6a)  | 0.0743(13) | 0.0957(15) | 0.0506(10) | -0.0149(9)  | 0.0080(9)  | 0.0306(11)  |
| C(1a)  | 0.0843(17) | 0.0803(15) | 0.0492(11) | -0.0143(10) | 0.0046(11) | 0.0132(13)  |
| C(2a)  | 0.0665(12) | 0.0627(11) | 0.0547(10) | -0.0046(8)  | -0.0045(9) | 0.0050(9)   |
| C(3a)  | 0.0529(11) | 0.0430(9)  | 0.0563(11) | -0.0006(8)  | 0.0093(9)  | -0.0020(8)  |
| C(4a)  | 0.146(3)   | 0.177(4)   | 0.0609(16) | -0.0392(19) | 0.0121(18) | 0.057(3)    |
| C(5a)  | 0.0629(14) | 0.0789(15) | 0.0777(15) | -0.0012(12) | 0.0175(11) | 0.0150(12)  |
| N(b)   | 0.0537(8)  | 0.0576(9)  | 0.0456(7)  | -0.0046(6)  | 0.0100(6)  | 0.0089(7)   |
| N(6b)  | 0.049(4)   | 0.055(4)   | 0.047(4)   | -0.005(4)   | 0.014(4)   | 0.009(4)    |
| C(1b)  | 0.056(4)   | 0.059(4)   | 0.053(4)   | -0.002(4)   | 0.006(4)   | 0.006(4)    |
| C(2b)  | 0.0665(12) | 0.0627(11) | 0.0547(10) | -0.0046(8)  | -0.0045(9) | 0.0050(9)   |
| C(3b)  | 0.060(3)   | 0.061(3)   | 0.050(3)   | -0.004(3)   | 0.004(3)   | 0.007(3)    |
| C(4b)  | 0.063(8)   | 0.075(8)   | 0.057(8)   | 0.000(7)    | -0.003(7)  | 0.008(8)    |
| C(5b)  | 0.076(9)   | 0.078(8)   | 0.054(8)   | -0.002(8)   | 0.007(7)   | 0.010(8)    |

<sup>a</sup>The estimated standard deviations of the least significant digits are given in parentheses. The anisotropic displacement factor exponent takes the form:  $-2 \pi [\text{h}^2 U_{11} + \dots + 2 \text{h k a}^* \text{b}^* U_{12}]$ .

**Table S6.** Hydrogen Atom Coordinates and Equivalent Isotropic Displacement Parameters ( $\text{\AA}^2$ ) for  $[\text{Fe}(\text{TPP})(\text{Hdmpz})]^a$

| atom   | $x$     | $y$     | $z$    | $U(\text{eq})$ |
|--------|---------|---------|--------|----------------|
| H(b1)  | 0.3587  | 0.2943  | 0.9074 | 0.061          |
| H(b2)  | 0.1981  | 0.2616  | 0.9841 | 0.060          |
| H(b3)  | 0.0523  | 0.1003  | 1.0318 | 0.062          |
| H(b4)  | 0.1159  | 0.0281  | 0.9837 | 0.064          |
| H(b5)  | 0.4509  | -0.0327 | 0.7817 | 0.063          |
| H(b6)  | 0.6149  | -0.0001 | 0.7090 | 0.064          |
| H(b7)  | 0.7543  | 0.1620  | 0.6522 | 0.062          |
| H(b8)  | 0.6868  | 0.2340  | 0.6970 | 0.062          |
| H(12)  | -0.0597 | 0.1856  | 0.8704 | 0.084          |
| H(13)  | -0.2070 | 0.2122  | 0.9551 | 0.104          |
| H(14)  | -0.1566 | 0.2308  | 1.1504 | 0.089          |
| H(15)  | 0.0396  | 0.2218  | 1.2637 | 0.084          |
| H(16)  | 0.1890  | 0.1953  | 1.1807 | 0.070          |
| H(22)  | 0.3886  | -0.0400 | 1.0058 | 0.074          |
| H(23)  | 0.3076  | -0.1080 | 1.0156 | 0.094          |
| H(24)  | 0.1264  | -0.1280 | 0.8855 | 0.100          |
| H(25)  | 0.0235  | -0.0797 | 0.7457 | 0.102          |
| H(26)  | 0.1002  | -0.0112 | 0.7360 | 0.076          |
| H(32)  | 0.8638  | 0.0922  | 0.7922 | 0.071          |
| H(33)  | 1.0153  | 0.0701  | 0.7058 | 0.087          |
| H(34)  | 0.9646  | 0.0393  | 0.5219 | 0.094          |
| H(35)  | 0.7615  | 0.0283  | 0.4242 | 0.093          |
| H(36)  | 0.6082  | 0.0505  | 0.5084 | 0.073          |
| H(44)  | 0.6467  | 0.3922  | 0.7597 | 0.088          |
| H(42a) | 0.6160  | 0.2903  | 0.9605 | 0.073          |
| H(43a) | 0.6781  | 0.3589  | 0.9391 | 0.088          |
| H(45a) | 0.5363  | 0.3538  | 0.5948 | 0.085          |
| H(46a) | 0.4603  | 0.2841  | 0.6134 | 0.068          |
| H(42b) | 0.6808  | 0.2819  | 0.9374 | 0.085          |
| H(43b) | 0.7490  | 0.3529  | 0.9189 | 0.092          |
| H(45b) | 0.4764  | 0.3658  | 0.6236 | 0.095          |
| H(46b) | 0.4163  | 0.2974  | 0.6415 | 0.081          |
| H(6aa) | 0.3839  | 0.0997  | 0.5637 | 0.090          |
| H(2aa) | 0.0724  | 0.1436  | 0.3828 | 0.078          |

**Table S6.** Continued

| atom   | $x$     | $y$    | $z$    | $U(\text{eq})$ |
|--------|---------|--------|--------|----------------|
| H(4aa) | 0.3693  | 0.0966 | 0.3502 | 0.196          |
| H(4ab) | 0.2463  | 0.1122 | 0.2632 | 0.196          |
| H(4ac) | 0.2538  | 0.0664 | 0.3220 | 0.196          |
| H(5aa) | 0.0584  | 0.1540 | 0.6825 | 0.110          |
| H(5ab) | -0.0004 | 0.1777 | 0.5627 | 0.110          |
| H(5ac) | 0.1145  | 0.1977 | 0.6527 | 0.110          |
| H(6ba) | 0.1264  | 0.1665 | 0.6813 | 0.060          |
| H(2ba) | 0.1103  | 0.1312 | 0.3628 | 0.078          |
| H(4ba) | -0.0620 | 0.1933 | 0.5500 | 0.103          |
| H(4bb) | -0.1156 | 0.1513 | 0.4797 | 0.103          |
| H(4bc) | -0.0738 | 0.1904 | 0.4142 | 0.103          |
| H(5ba) | 0.4231  | 0.0986 | 0.5617 | 0.107          |
| H(5bb) | 0.3846  | 0.1177 | 0.4336 | 0.107          |
| H(5bc) | 0.3307  | 0.0733 | 0.4605 | 0.107          |

<sup>a</sup> $U(\text{eq})$  is defined as one third of the trace of the orthogonalized  $\mathbf{U}_{ij}$  tensor the estimated standard deviations of the least significant digits are given in parentheses.



**Table S7.** Complete Crystallographic Details for [Fe(Tp-OCH<sub>3</sub>PP)(Hdmpz)]

|                                                              |                                                                   |
|--------------------------------------------------------------|-------------------------------------------------------------------|
| formula                                                      | C <sub>60</sub> H <sub>52</sub> FeN <sub>6</sub> O <sub>4</sub>   |
| FW, amu                                                      | 976.93                                                            |
| <i>a</i> , Å                                                 | 11.9585(3)                                                        |
| <i>b</i> , Å                                                 | 35.4853(9)                                                        |
| <i>c</i> , Å                                                 | 11.9857(3)                                                        |
| $\beta$ , deg                                                | 106.9490(10)                                                      |
| <i>V</i> , Å <sup>3</sup>                                    | 4865.2(2)                                                         |
| space group                                                  | <i>P</i> 2 <sub>1</sub> / <i>c</i>                                |
| <i>Z</i>                                                     | 4                                                                 |
| D <sub>c</sub> , g/cm <sup>3</sup>                           | 1.334                                                             |
| F(000)                                                       | 2048                                                              |
| $\mu$ , mm <sup>-1</sup>                                     | 0.367                                                             |
| crystal dimensions, mm                                       | 0.52 × 0.46 × 0.20                                                |
| radiation                                                    | MoK $\alpha$ , $\bar{\lambda}$ = 0.71073 Å                        |
| temperature, K                                               | 100(2)                                                            |
| diffractometer                                               | Bruker Apex CCD                                                   |
| $\theta$ range for collected data, deg                       | 1.78–28.46                                                        |
| index range                                                  | –15 ≤ <i>h</i> ≤ 15<br>–47 ≤ <i>k</i> ≤ 47<br>–15 ≤ <i>l</i> ≤ 16 |
| total data collected                                         | 86053                                                             |
| absorption correction                                        | Semi-empirical from equivalents                                   |
| relative transmission coefficients (I)                       | 0.9303 and 0.8322                                                 |
| unique data                                                  | 12075 ( <i>R</i> <sub>int</sub> = 0.048)                          |
| unique observed data [ <i>I</i> > 2 $\sigma$ ( <i>I</i> )]   | 10028                                                             |
| refinement method                                            | Full-matrix least-squares on F <sup>2</sup>                       |
| data/restraints/parameters                                   | 12075/58/692                                                      |
| goodness-of-fit (based on <i>F</i> <sup>2</sup> )            | 1.028                                                             |
| final <i>R</i> indices [ <i>I</i> > 2 $\sigma$ ( <i>I</i> )] | <i>R</i> <sub>1</sub> = 0.0428, <i>wR</i> <sub>2</sub> = 0.1047   |
| final <i>R</i> indices (all data)                            | <i>R</i> <sub>1</sub> = 0.0554, <i>wR</i> <sub>2</sub> = 0.1132   |

**Table S8.** Atomic Coordinates and Equivalent Isotropic Displacement Parameters ( $\text{\AA}^2$ ) for  $[\text{Fe}(\text{T}p\text{-OCH}_3\text{PP})(\text{Hdmpz})]^a$

| atom  | <i>x</i>     | <i>y</i>   | <i>z</i>    | <i>U</i> (eq) |
|-------|--------------|------------|-------------|---------------|
| Fe(1) | 0.63725(2)   | 0.14483(1) | 0.21371(2)  | 0.0162(1)     |
| N(1)  | 0.56250(12)  | 0.09290(4) | 0.22528(11) | 0.0177(3)     |
| N(2)  | 0.49539(13)  | 0.17051(4) | 0.24516(12) | 0.0194(3)     |
| N(3)  | 0.67946(12)  | 0.19597(4) | 0.15224(11) | 0.0174(3)     |
| N(4)  | 0.74507(12)  | 0.11836(4) | 0.13033(12) | 0.0179(3)     |
| C(a1) | 0.60159(14)  | 0.05820(4) | 0.20197(13) | 0.0176(3)     |
| C(a2) | 0.46702(14)  | 0.08643(4) | 0.26378(13) | 0.0177(3)     |
| C(a3) | 0.41316(15)  | 0.15318(4) | 0.28708(14) | 0.0197(3)     |
| C(a4) | 0.47883(15)  | 0.20867(5) | 0.25315(15) | 0.0214(3)     |
| C(a5) | 0.63708(14)  | 0.23053(4) | 0.17130(13) | 0.0171(3)     |
| C(a6) | 0.77103(14)  | 0.20272(4) | 0.10753(13) | 0.0175(3)     |
| C(a7) | 0.82477(14)  | 0.13568(4) | 0.08411(13) | 0.0177(3)     |
| C(a8) | 0.75982(14)  | 0.08020(4) | 0.12091(13) | 0.0175(3)     |
| C(b1) | 0.52851(15)  | 0.02901(4) | 0.22837(14) | 0.0201(3)     |
| C(b2) | 0.44595(14)  | 0.04633(4) | 0.26670(14) | 0.0187(3)     |
| C(b3) | 0.34360(16)  | 0.18121(5) | 0.32291(16) | 0.0247(4)     |
| C(b4) | 0.38405(17)  | 0.21529(5) | 0.30159(16) | 0.0260(4)     |
| C(b5) | 0.70399(15)  | 0.25993(4) | 0.13709(14) | 0.0203(3)     |
| C(b6) | 0.78682(15)  | 0.24286(5) | 0.09850(14) | 0.0205(3)     |
| C(b7) | 0.89118(14)  | 0.10741(5) | 0.04469(14) | 0.0197(3)     |
| C(b8) | 0.85205(14)  | 0.07333(5) | 0.06896(14) | 0.0192(3)     |
| C(m1) | 0.39836(14)  | 0.11412(4) | 0.29476(13) | 0.0180(3)     |
| C(m2) | 0.54476(14)  | 0.23671(4) | 0.21928(14) | 0.0181(3)     |
| C(m3) | 0.83945(14)  | 0.17495(4) | 0.07544(13) | 0.0176(3)     |
| C(m4) | 0.69433(14)  | 0.05179(4) | 0.15579(13) | 0.0175(3)     |
| C(11) | 0.30321(14)  | 0.10178(4) | 0.34448(14) | 0.0176(3)     |
| C(12) | 0.32907(15)  | 0.09513(5) | 0.46370(14) | 0.0210(3)     |
| C(13) | 0.24267(15)  | 0.08639(5) | 0.51449(14) | 0.0221(3)     |
| C(14) | 0.12704(14)  | 0.08408(5) | 0.44600(15) | 0.0203(3)     |
| C(15) | 0.09919(15)  | 0.09013(5) | 0.32693(15) | 0.0219(3)     |
| C(16) | 0.18778(15)  | 0.09879(5) | 0.27701(14) | 0.0217(3)     |
| O(1)  | 0.04737(11)  | 0.07545(4) | 0.50391(11) | 0.0284(3)     |
| C(17) | -0.07048(16) | 0.06947(6) | 0.43572(17) | 0.0297(4)     |
| C(21) | 0.51495(14)  | 0.27691(4) | 0.23661(14) | 0.0184(3)     |

**Table S8.** Continued

| atom  | <i>x</i>    | <i>y</i>    | <i>z</i>     | <i>U</i> (eq) |
|-------|-------------|-------------|--------------|---------------|
| C(22) | 0.4270(2)   | 0.29596(5)  | 0.15451(16)  | 0.0362(5)     |
| C(23) | 0.4011(2)   | 0.33303(5)  | 0.17214(17)  | 0.0379(5)     |
| C(24) | 0.46318(15) | 0.35206(4)  | 0.27226(15)  | 0.0209(3)     |
| C(25) | 0.55114(15) | 0.33375(5)  | 0.35435(15)  | 0.0225(3)     |
| C(26) | 0.57496(14) | 0.29619(5)  | 0.33530(15)  | 0.0222(3)     |
| O(2)  | 0.42924(11) | 0.38856(3)  | 0.28160(11)  | 0.0274(3)     |
| C(27) | 0.48252(17) | 0.40759(5)  | 0.38848(16)  | 0.0289(4)     |
| C(31) | 0.93539(14) | 0.18751(4)  | 0.02760(14)  | 0.0190(3)     |
| C(32) | 0.91281(15) | 0.20575(5)  | −0.07982(15) | 0.0222(3)     |
| C(33) | 1.00294(16) | 0.21528(5)  | −0.12547(16) | 0.0254(4)     |
| C(34) | 1.11795(16) | 0.20623(5)  | −0.06375(17) | 0.0260(4)     |
| C(35) | 1.14221(16) | 0.18927(5)  | 0.04409(17)  | 0.0272(4)     |
| C(36) | 1.05097(15) | 0.18027(5)  | 0.08896(15)  | 0.0237(3)     |
| O(3)  | 0.84811(13) | −0.09546(3) | 0.09432(11)  | 0.0319(3)     |
| C(37) | 1.3141(2)   | 0.19776(6)  | −0.0665(3)   | 0.0477(6)     |
| C(41) | 0.72765(14) | 0.01185(4)  | 0.14094(14)  | 0.0183(3)     |
| C(42) | 0.70925(16) | −0.00432(5) | 0.03082(14)  | 0.0226(3)     |
| C(43) | 0.74786(16) | −0.04031(5) | 0.01796(15)  | 0.0250(4)     |
| C(44) | 0.80714(15) | −0.06100(4) | 0.11570(15)  | 0.0219(3)     |
| C(45) | 0.82289(15) | −0.04612(4) | 0.22578(14)  | 0.0204(3)     |
| C(46) | 0.78186(14) | −0.01004(4) | 0.23727(14)  | 0.0192(3)     |
| O(4)  | 1.20110(13) | 0.21439(4)  | −0.11802(13) | 0.0354(3)     |
| C(47) | 0.9154(2)   | −0.11575(6) | 0.19374(19)  | 0.0446(6)     |
| N(5a) | 0.76474(17) | 0.15476(6)  | 0.37827(16)  | 0.0224(4)     |
| N(6a) | 0.87217(15) | 0.16826(5)  | 0.37985(15)  | 0.0272(4)     |
| C(1a) | 0.94266(18) | 0.17329(5)  | 0.48863(18)  | 0.0285(5)     |
| C(2a) | 0.8782(2)   | 0.16295(7)  | 0.56165(19)  | 0.0278(4)     |
| C(3a) | 0.76900(18) | 0.15166(5)  | 0.49007(16)  | 0.0233(4)     |
| C(4a) | 1.0654(2)   | 0.18733(7)  | 0.5119(2)    | 0.0424(6)     |
| C(5a) | 0.6662(2)   | 0.13797(6)  | 0.52419(19)  | 0.0337(5)     |
| N(5b) | 0.7570(12)  | 0.1497(5)   | 0.3898(8)    | 0.023(4)      |
| N(6b) | 0.7104(10)  | 0.1377(4)   | 0.4766(10)   | 0.021(3)      |
| C(1b) | 0.7824(10)  | 0.1448(3)   | 0.5839(9)    | 0.023(3)      |
| C(2b) | 0.8807(11)  | 0.1616(5)   | 0.5688(10)   | 0.0278(4)     |

**Table S8.** Continued

| atom  | $x$         | $y$         | $z$         | $U(\text{eq})$ |
|-------|-------------|-------------|-------------|----------------|
| C(3b) | 0.8611(11)  | 0.1642(3)   | 0.4465(10)  | 0.024(3)       |
| C(4b) | 0.7491(15)  | 0.1345(5)   | 0.6921(10)  | 0.032(4)       |
| C(5b) | 0.9396(15)  | 0.1797(5)   | 0.3828(15)  | 0.033(4)       |
| C(1S) | 0.18843(16) | -0.02218(5) | 0.26071(16) | 0.0276(4)      |
| C(2S) | 0.20865(18) | -0.00695(5) | 0.37103(17) | 0.0295(4)      |
| C(3S) | 0.31100(19) | -0.01413(5) | 0.45758(17) | 0.0315(4)      |
| C(4S) | 0.39619(18) | -0.03659(5) | 0.43576(16) | 0.0308(4)      |
| C(5S) | 0.37736(18) | -0.05249(5) | 0.32677(17) | 0.0302(4)      |
| C(6S) | 0.27389(17) | -0.04561(5) | 0.24029(16) | 0.0291(4)      |
| C(7S) | 0.07959(18) | -0.01277(7) | 0.16492(19) | 0.0385(5)      |

<sup>a</sup> $U(\text{eq})$  is defined as one third of the trace of the orthogonalized  $\mathbf{U}_{ij}$  tensor. The estimated standard deviations of the least significant digits are given in parentheses.

**Table S9.** Bond Lengths for [Fe(*Tp*-OCH<sub>3</sub>PP)(Hdmpz)]<sup>a</sup>

| bond        | length (Å) | bond         | length (Å) |
|-------------|------------|--------------|------------|
| Fe(1)–N(2)  | 2.0548(14) | C(31)–C(36)  | 1.387(2)   |
| Fe(1)–N(1)  | 2.0704(13) | C(31)–C(32)  | 1.395(2)   |
| Fe(1)–N(4)  | 2.0724(14) | C(32)–C(33)  | 1.386(2)   |
| Fe(1)–N(3)  | 2.0755(13) | C(32)–H(32a) | 0.9500     |
| Fe(1)–N(5a) | 2.1414(18) | C(33)–C(34)  | 1.396(3)   |
| Fe(1)–N(5b) | 2.185(10)  | C(33)–H(33a) | 0.9500     |
| N(1)–C(a2)  | 1.370(2)   | C(34)–O(4)   | 1.368(2)   |
| N(1)–C(a1)  | 1.374(2)   | C(34)–C(35)  | 1.378(3)   |
| N(2)–C(a3)  | 1.373(2)   | C(35)–C(36)  | 1.387(2)   |
| N(2)–C(a4)  | 1.376(2)   | C(35)–H(35a) | 0.9500     |
| N(3)–C(a5)  | 1.371(2)   | C(36)–H(36a) | 0.9500     |
| N(3)–C(a6)  | 1.373(2)   | O(3)–C(44)   | 1.3693(19) |
| N(4)–C(a8)  | 1.374(2)   | O(3)–C(47)   | 1.424(2)   |
| N(4)–C(a7)  | 1.379(2)   | C(37)–O(4)   | 1.439(3)   |
| C(a1)–C(m4) | 1.395(2)   | C(37)–H(37a) | 0.9800     |
| C(a1)–C(b1) | 1.449(2)   | C(37)–H(37b) | 0.9800     |
| C(a2)–C(m1) | 1.398(2)   | C(37)–H(37c) | 0.9800     |
| C(a2)–C(b2) | 1.447(2)   | C(41)–C(46)  | 1.386(2)   |
| C(a3)–C(m1) | 1.404(2)   | C(41)–C(42)  | 1.397(2)   |
| C(a3)–C(b3) | 1.440(2)   | C(42)–C(43)  | 1.382(2)   |
| C(a4)–C(m2) | 1.401(2)   | C(42)–H(42a) | 0.9500     |
| C(a4)–C(b4) | 1.435(2)   | C(43)–C(44)  | 1.389(2)   |
| C(a5)–C(m2) | 1.403(2)   | C(43)–H(43a) | 0.9500     |
| C(a5)–C(b5) | 1.445(2)   | C(44)–C(45)  | 1.382(2)   |
| C(a6)–C(m3) | 1.404(2)   | C(45)–C(46)  | 1.392(2)   |
| C(a6)–C(b6) | 1.445(2)   | C(45)–H(45a) | 0.9500     |
| C(a7)–C(m3) | 1.412(2)   | C(46)–H(46a) | 0.9500     |
| C(a7)–C(b7) | 1.442(2)   | C(47)–H(47a) | 0.9800     |
| C(a8)–C(m4) | 1.413(2)   | C(47)–H(47b) | 0.9800     |
| C(a8)–C(b8) | 1.437(2)   | C(47)–H(47c) | 0.9800     |
| C(b1)–C(b2) | 1.352(2)   | N(5a)–C(3a)  | 1.331(3)   |
| C(b1)–H(b1) | 0.9500     | N(5a)–N(6a)  | 1.366(3)   |
| C(b2)–H(b2) | 0.9500     | N(6a)–C(1a)  | 1.342(3)   |
| C(b3)–C(b4) | 1.354(2)   | N(6a)–H(6a)  | 0.8800     |

**Table S9.** Continued

| bond         | length (Å) | bond         | length (Å) |
|--------------|------------|--------------|------------|
| C(b3)–H(b3)  | 0.9500     | C(1a)–C(2a)  | 1.374(3)   |
| C(b4)–H(b4)  | 0.9500     | C(1a)–C(4a)  | 1.497(3)   |
| C(b5)–C(b6)  | 1.352(2)   | C(2a)–C(3a)  | 1.396(3)   |
| C(b5)–H(b5)  | 0.9500     | C(2a)–H(2a)  | 0.9500     |
| C(b6)–H(b6)  | 0.9500     | C(3a)–C(5a)  | 1.486(3)   |
| C(b7)–C(b8)  | 1.358(2)   | C(4a)–H(4a1) | 0.9800     |
| C(b7)–H(b7)  | 0.9500     | C(4a)–H(4a2) | 0.9800     |
| C(b8)–H(b8)  | 0.9500     | C(4a)–H(4a3) | 0.9800     |
| C(m1)–C(11)  | 1.496(2)   | C(5a)–H(5a1) | 0.9800     |
| C(m2)–C(21)  | 1.499(2)   | C(5a)–H(5a2) | 0.9800     |
| C(m3)–C(31)  | 1.492(2)   | C(5a)–H(5a3) | 0.9800     |
| C(m4)–C(41)  | 1.497(2)   | N(5b)–C(3b)  | 1.3337     |
| C(11)–C(16)  | 1.386(2)   | N(5b)–N(6b)  | 1.3830     |
| C(11)–C(12)  | 1.391(2)   | N(6b)–C(1b)  | 1.3473     |
| C(12)–C(13)  | 1.379(2)   | N(6b)–H(6ba) | 0.8800     |
| C(12)–H(12a) | 0.9500     | C(1b)–C(2b)  | 1.3765     |
| C(13)–C(14)  | 1.390(2)   | C(1b)–C(4b)  | 1.5089     |
| C(13)–H(13a) | 0.9500     | C(2b)–C(3b)  | 1.4181     |
| C(14)–O(1)   | 1.367(2)   | C(2b)–H(2ba) | 0.9500     |
| C(14)–C(15)  | 1.384(2)   | C(3b)–C(5b)  | 1.4788     |
| C(15)–C(16)  | 1.394(2)   | C(4b)–H(4b1) | 0.9800     |
| C(15)–H(15a) | 0.9500     | C(4b)–H(4b2) | 0.9800     |
| C(16)–H(16a) | 0.9500     | C(4b)–H(4b3) | 0.9800     |
| O(1)–C(17)   | 1.424(2)   | C(5b)–H(5b1) | 0.9800     |
| C(17)–H(17a) | 0.9800     | C(5b)–H(5b2) | 0.9800     |
| C(17)–H(17b) | 0.9800     | C(5b)–H(5b3) | 0.9800     |
| C(17)–H(17c) | 0.9800     | C(1S)–C(2S)  | 1.383(3)   |
| C(21)–C(26)  | 1.374(2)   | C(1S)–C(6S)  | 1.393(3)   |
| C(21)–C(22)  | 1.389(2)   | C(1S)–C(7S)  | 1.501(3)   |
| C(22)–C(23)  | 1.381(3)   | C(2S)–C(3S)  | 1.378(3)   |
| C(22)–H(22a) | 0.9500     | C(2S)–H(2Sa) | 0.9500     |
| C(23)–C(24)  | 1.389(2)   | C(3S)–C(4S)  | 1.377(3)   |
| C(23)–H(23a) | 0.9500     | C(3S)–H(3Sa) | 0.9500     |
| C(24)–O(2)   | 1.3715(19) | C(4S)–C(5S)  | 1.380(3)   |

**Table S9.** Continued

| bond         | length (Å) | bond         | length (Å) |
|--------------|------------|--------------|------------|
| C(24)–C(25)  | 1.376(2)   | C(4S)–H(4Sa) | 0.9500     |
| C(25)–C(26)  | 1.396(2)   | C(5S)–C(6S)  | 1.385(3)   |
| C(25)–H(25a) | 0.9500     | C(5S)–H(5Sa) | 0.9500     |
| C(26)–H(26a) | 0.9500     | C(6S)–H(6Sa) | 0.9500     |
| O(2)–C(27)   | 1.424(2)   | C(7S)–H(7S1) | 0.9800     |
| C(27)–H(27a) | 0.9800     | C(7S)–H(7S2) | 0.9800     |
| C(27)–H(27b) | 0.9800     | C(7S)–H(7S3) | 0.9800     |
| C(27)–H(27c) | 0.9800     |              |            |

<sup>a</sup>The estimated standard deviations of the least significant digits are given in parentheses.

**Table S10.** Bond Angles for [Fe(*Tp*-OCH<sub>3</sub>PP)(Hdmpz)]<sup>a</sup>

| angle             | degree     | angle               | degree     |
|-------------------|------------|---------------------|------------|
| N(2)–Fe(1)–N(1)   | 89.24(5)   | O(2)–C(24)–C(25)    | 124.77(15) |
| N(2)–Fe(1)–N(4)   | 162.24(5)  | O(2)–C(24)–C(23)    | 115.69(15) |
| N(1)–Fe(1)–N(4)   | 88.30(5)   | C(25)–C(24)–C(23)   | 119.54(15) |
| N(2)–Fe(1)–N(3)   | 88.67(5)   | C(24)–C(25)–C(26)   | 118.94(15) |
| N(1)–Fe(1)–N(3)   | 163.03(5)  | C(24)–C(25)–H(25a)  | 120.5      |
| N(4)–Fe(1)–N(3)   | 88.58(5)   | C(26)–C(25)–H(25a)  | 120.5      |
| N(2)–Fe(1)–N(5a)  | 99.34(7)   | C(21)–C(26)–C(25)   | 122.42(15) |
| N(1)–Fe(1)–N(5a)  | 106.87(6)  | C(21)–C(26)–H(26a)  | 118.8      |
| N(4)–Fe(1)–N(5a)  | 98.21(7)   | C(25)–C(26)–H(26a)  | 118.8      |
| N(3)–Fe(1)–N(5a)  | 90.09(6)   | C(24)–O(2)–C(27)    | 117.12(13) |
| N(2)–Fe(1)–N(5b)  | 97.5(4)    | O(2)–C(27)–H(27a)   | 109.5      |
| N(1)–Fe(1)–N(5b)  | 100.4(4)   | O(2)–C(27)–H(27b)   | 109.5      |
| N(4)–Fe(1)–N(5b)  | 100.2(4)   | H(27a)–C(27)–H(27b) | 109.5      |
| N(3)–Fe(1)–N(5b)  | 96.6(4)    | O(2)–C(27)–H(27c)   | 109.5      |
| N(5a)–Fe(1)–N(5b) | 6.8(4)     | H(27a)–C(27)–H(27c) | 109.5      |
| C(a2)–N(1)–C(a1)  | 106.53(13) | H(27b)–C(27)–H(27c) | 109.5      |
| C(a2)–N(1)–Fe(1)  | 126.18(10) | C(36)–C(31)–C(32)   | 118.03(15) |
| C(a1)–N(1)–Fe(1)  | 127.22(11) | C(36)–C(31)–C(m3)   | 119.98(15) |
| C(a3)–N(2)–C(a4)  | 106.39(13) | C(32)–C(31)–C(m3)   | 121.96(15) |
| C(a3)–N(2)–Fe(1)  | 125.89(11) | C(33)–C(32)–C(31)   | 120.94(16) |
| C(a4)–N(2)–Fe(1)  | 126.32(11) | C(33)–C(32)–H(32a)  | 119.5      |
| C(a5)–N(3)–C(a6)  | 106.54(13) | C(31)–C(32)–H(32a)  | 119.5      |
| C(a5)–N(3)–Fe(1)  | 125.65(11) | C(32)–C(33)–C(34)   | 119.62(16) |
| C(a6)–N(3)–Fe(1)  | 126.52(10) | C(32)–C(33)–H(33a)  | 120.2      |
| C(a8)–N(4)–C(a7)  | 106.61(13) | C(34)–C(33)–H(33a)  | 120.2      |
| C(a8)–N(4)–Fe(1)  | 126.80(11) | O(4)–C(34)–C(35)    | 123.69(17) |
| C(a7)–N(4)–Fe(1)  | 126.29(10) | O(4)–C(34)–C(33)    | 116.08(17) |
| N(1)–C(a1)–C(m4)  | 125.70(14) | C(35)–C(34)–C(33)   | 120.21(16) |
| N(1)–C(a1)–C(b1)  | 109.49(14) | C(34)–C(35)–C(36)   | 119.34(17) |
| C(m4)–C(a1)–C(b1) | 124.76(14) | C(34)–C(35)–H(35a)  | 120.3      |
| N(1)–C(a2)–C(m1)  | 125.67(14) | C(36)–C(35)–H(35a)  | 120.3      |
| N(1)–C(a2)–C(b2)  | 109.95(14) | C(35)–C(36)–C(31)   | 121.77(16) |
| C(m1)–C(a2)–C(b2) | 124.38(15) | C(35)–C(36)–H(36a)  | 119.1      |
| N(2)–C(a3)–C(m1)  | 125.70(15) | C(31)–C(36)–H(36a)  | 119.1      |



**Table S10.** Continued

| angle             | degree     | angle               | degree     |
|-------------------|------------|---------------------|------------|
| N(2)–C(a3)–C(b3)  | 109.72(14) | C(44)–O(3)–C(47)    | 116.16(14) |
| C(m1)–C(a3)–C(b3) | 124.58(15) | O(4)–C(37)–H(37a)   | 109.5      |
| N(2)–C(a4)–C(m2)  | 125.04(15) | O(4)–C(37)–H(37b)   | 109.5      |
| N(2)–C(a4)–C(b4)  | 109.63(14) | H(37a)–C(37)–H(37b) | 109.5      |
| C(m2)–C(a4)–C(b4) | 125.33(15) | O(4)–C(37)–H(37c)   | 109.5      |
| N(3)–C(a5)–C(m2)  | 125.55(14) | H(37a)–C(37)–H(37c) | 109.5      |
| N(3)–C(a5)–C(b5)  | 109.65(14) | H(37b)–C(37)–H(37c) | 109.5      |
| C(m2)–C(a5)–C(b5) | 124.78(14) | C(46)–C(41)–C(42)   | 117.62(14) |
| N(3)–C(a6)–C(m3)  | 125.40(14) | C(46)–C(41)–C(m4)   | 120.52(14) |
| N(3)–C(a6)–C(b6)  | 109.72(14) | C(42)–C(41)–C(m4)   | 121.82(14) |
| C(m3)–C(a6)–C(b6) | 124.88(15) | C(43)–C(42)–C(41)   | 121.29(15) |
| N(4)–C(a7)–C(m3)  | 125.79(14) | C(43)–C(42)–H(42a)  | 119.4      |
| N(4)–C(a7)–C(b7)  | 109.43(14) | C(41)–C(42)–H(42a)  | 119.4      |
| C(m3)–C(a7)–C(b7) | 124.78(15) | C(42)–C(43)–C(44)   | 119.96(16) |
| N(4)–C(a8)–C(m4)  | 125.68(15) | C(42)–C(43)–H(43a)  | 120.0      |
| N(4)–C(a8)–C(b8)  | 109.63(14) | C(44)–C(43)–H(43a)  | 120.0      |
| C(m4)–C(a8)–C(b8) | 124.68(14) | O(3)–C(44)–C(45)    | 124.28(15) |
| C(b2)–C(b1)–C(a1) | 107.22(14) | O(3)–C(44)–C(43)    | 115.89(15) |
| C(b2)–C(b1)–H(b1) | 126.4      | C(45)–C(44)–C(43)   | 119.82(15) |
| C(a1)–C(b1)–H(b1) | 126.4      | C(44)–C(45)–C(46)   | 119.46(15) |
| C(b1)–C(b2)–C(a2) | 106.81(14) | C(44)–C(45)–H(45a)  | 120.3      |
| C(b1)–C(b2)–H(b2) | 126.6      | C(46)–C(45)–H(45a)  | 120.3      |
| C(a2)–C(b2)–H(b2) | 126.6      | C(41)–C(46)–C(45)   | 121.73(15) |
| C(b4)–C(b3)–C(a3) | 106.94(15) | C(41)–C(46)–H(46a)  | 119.1      |
| C(b4)–C(b3)–H(b3) | 126.5      | C(45)–C(46)–H(46a)  | 119.1      |
| C(a3)–C(b3)–H(b3) | 126.5      | C(34)–O(4)–C(37)    | 115.55(15) |
| C(b3)–C(b4)–C(a4) | 107.32(15) | O(3)–C(47)–H(47a)   | 109.5      |
| C(b3)–C(b4)–H(b4) | 126.3      | O(3)–C(47)–H(47b)   | 109.5      |
| C(a4)–C(b4)–H(b4) | 126.3      | H(47a)–C(47)–H(47b) | 109.5      |
| C(b6)–C(b5)–C(a5) | 107.16(14) | O(3)–C(47)–H(47c)   | 109.5      |
| C(b6)–C(b5)–H(b5) | 126.4      | H(47a)–C(47)–H(47c) | 109.5      |
| C(a5)–C(b5)–H(b5) | 126.4      | H(47b)–C(47)–H(47c) | 109.5      |
| C(b5)–C(b6)–C(a6) | 106.93(14) | C(3a)–N(5a)–N(6a)   | 104.79(17) |
| C(b5)–C(b6)–H(b6) | 126.5      | C(3a)–N(5a)–Fe(1)   | 136.21(16) |

**Table S10.** Continued

| angle              | degree     | angle              | degree     |
|--------------------|------------|--------------------|------------|
| C(a6)–C(b6)–H(b6)  | 126.5      | N(6a)–N(5a)–Fe(1)  | 118.99(13) |
| C(b8)–C(b7)–C(a7)  | 106.99(14) | C(1a)–N(6a)–N(5a)  | 112.45(18) |
| C(b8)–C(b7)–H(b7)  | 126.5      | C(1a)–N(6a)–H(6a)  | 123.8      |
| C(a7)–C(b7)–H(b7)  | 126.5      | N(5a)–N(6a)–H(6a)  | 123.8      |
| C(b7)–C(b8)–C(a8)  | 107.32(14) | N(6a)–C(1a)–C(2a)  | 105.86(18) |
| C(b7)–C(b8)–H(b8)  | 126.3      | N(6a)–C(1a)–C(4a)  | 122.0(2)   |
| C(a8)–C(b8)–H(b8)  | 126.3      | C(2a)–C(1a)–C(4a)  | 132.2(2)   |
| C(a2)–C(m1)–C(a3)  | 125.55(15) | C(1a)–C(2a)–C(3a)  | 106.45(19) |
| C(a2)–C(m1)–C(11)  | 118.28(14) | C(1a)–C(2a)–H(2a)  | 126.8      |
| C(a3)–C(m1)–C(11)  | 116.13(14) | C(3a)–C(2a)–H(2a)  | 126.8      |
| C(a4)–C(m2)–C(a5)  | 125.76(14) | N(5a)–C(3a)–C(2a)  | 110.5(2)   |
| C(a4)–C(m2)–C(21)  | 117.32(14) | N(5a)–C(3a)–C(5a)  | 120.82(19) |
| C(a5)–C(m2)–C(21)  | 116.92(14) | C(2a)–C(3a)–C(5a)  | 128.73(19) |
| C(a6)–C(m3)–C(a7)  | 125.27(15) | C(3b)–N(5b)–N(6b)  | 104.9      |
| C(a6)–C(m3)–C(31)  | 118.06(14) | C(3b)–N(5b)–Fe(1)  | 140.7(6)   |
| C(a7)–C(m3)–C(31)  | 116.67(14) | N(6b)–N(5b)–Fe(1)  | 114.0(6)   |
| C(a1)–C(m4)–C(a8)  | 125.06(14) | C(1b)–N(6b)–N(5b)  | 111.9      |
| C(a1)–C(m4)–C(41)  | 118.13(14) | C(1b)–N(6b)–H(6ba) | 124.0      |
| C(a8)–C(m4)–C(41)  | 116.80(14) | N(5b)–N(6b)–H(6ba) | 124.0      |
| C(16)–C(11)–C(12)  | 118.15(15) | N(6b)–C(1b)–C(2b)  | 106.8      |
| C(16)–C(11)–C(m1)  | 122.28(14) | N(6b)–C(1b)–C(4b)  | 121.3      |
| C(12)–C(11)–C(m1)  | 119.46(15) | C(2b)–C(1b)–C(4b)  | 131.9      |
| C(13)–C(12)–C(11)  | 121.39(15) | C(1b)–C(2b)–C(3b)  | 105.8      |
| C(13)–C(12)–H(12a) | 119.3      | C(1b)–C(2b)–H(2ba) | 127.1      |
| C(11)–C(12)–H(12a) | 119.3      | C(3b)–C(2b)–H(2ba) | 127.1      |
| C(12)–C(13)–C(14)  | 119.81(15) | N(5b)–C(3b)–C(2b)  | 110.5      |
| C(12)–C(13)–H(13a) | 120.1      | N(5b)–C(3b)–C(5b)  | 121.3      |
| C(14)–C(13)–H(13a) | 120.1      | C(2b)–C(3b)–C(5b)  | 128.2      |
| O(1)–C(14)–C(15)   | 124.36(15) | C(2S)–C(1S)–C(6S)  | 117.93(18) |
| O(1)–C(14)–C(13)   | 115.72(15) | C(2S)–C(1S)–C(7S)  | 121.02(18) |
| C(15)–C(14)–C(13)  | 119.92(15) | C(6S)–C(1S)–C(7S)  | 121.02(17) |
| C(14)–C(15)–C(16)  | 119.47(15) | C(3S)–C(2S)–C(1S)  | 121.12(18) |
| C(14)–C(15)–H(15a) | 120.3      | C(3S)–C(2S)–H(2Sa) | 119.4      |
| C(16)–C(15)–H(15a) | 120.3      | C(1S)–C(2S)–H(2Sa) | 119.4      |

**Table S10.** Continued

| angle               | degree     | angle               | degree     |
|---------------------|------------|---------------------|------------|
| C(11)–C(16)–C(15)   | 121.25(15) | C(4S)–C(3S)–C(2S)   | 120.53(18) |
| C(11)–C(16)–H(16a)  | 119.4      | C(4S)–C(3S)–H(3Sa)  | 119.7      |
| C(15)–C(16)–H(16a)  | 119.4      | C(2S)–C(3S)–H(3Sa)  | 119.7      |
| C(14)–O(1)–C(17)    | 117.49(14) | C(3S)–C(4S)–C(5S)   | 119.39(18) |
| O(1)–C(17)–H(17a)   | 109.5      | C(3S)–C(4S)–H(4Sa)  | 120.3      |
| O(1)–C(17)–H(17b)   | 109.5      | C(5S)–C(4S)–H(4Sa)  | 120.3      |
| H(17a)–C(17)–H(17b) | 109.5      | C(4S)–C(5S)–C(6S)   | 120.00(18) |
| O(1)–C(17)–H(17c)   | 109.5      | C(4S)–C(5S)–H(5Sa)  | 120.0      |
| H(17a)–C(17)–H(17c) | 109.5      | C(6S)–C(5S)–H(5Sa)  | 120.0      |
| H(17b)–C(17)–H(17c) | 109.5      | C(5S)–C(6S)–C(1S)   | 120.99(18) |
| C(26)–C(21)–C(22)   | 117.73(15) | C(5S)–C(6S)–H(6Sa)  | 119.5      |
| C(26)–C(21)–C(m2)   | 120.49(15) | C(1S)–C(6S)–H(6Sa)  | 119.5      |
| C(22)–C(21)–C(m2)   | 121.78(15) | C(1S)–C(7S)–H(7S1)  | 109.5      |
| C(23)–C(22)–C(21)   | 120.81(17) | C(1S)–C(7S)–H(7S2)  | 109.5      |
| C(23)–C(22)–H(22a)  | 119.6      | H(7S1)–C(7S)–H(7S2) | 109.5      |
| C(21)–C(22)–H(22a)  | 119.6      | C(1S)–C(7S)–H(7S3)  | 109.5      |
| C(22)–C(23)–C(24)   | 120.55(17) | H(7S1)–C(7S)–H(7S3) | 109.5      |
| C(22)–C(23)–H(23a)  | 119.7      | H(7S2)–C(7S)–H(7S3) | 109.5      |
| C(24)–C(23)–H(23a)  | 119.7      |                     |            |

<sup>a</sup>The estimated standard deviations of the least significant digits are given in parentheses.

**Table S11.** Anisotropic Displacement Parameters ( $\text{\AA}^2$ ) for  $[\text{Fe}(\text{Tp-OCH}_3\text{PP})(\text{Hdmpz})]^\alpha$ 

| atom  | $U_{11}$   | $U_{22}$   | $U_{33}$   | $U_{23}$   | $U_{13}$  | $U_{12}$   |
|-------|------------|------------|------------|------------|-----------|------------|
| Fe(1) | 0.0184(1)  | 0.0120(1)  | 0.0182(1)  | 0.0005(1)  | 0.0054(1) | 0.0001(1)  |
| N(1)  | 0.0200(7)  | 0.0138(6)  | 0.0197(6)  | 0.0005(5)  | 0.0064(5) | -0.0002(5) |
| N(2)  | 0.0238(7)  | 0.0131(6)  | 0.0232(7)  | 0.0011(5)  | 0.0097(5) | 0.0000(5)  |
| N(3)  | 0.0176(7)  | 0.0160(6)  | 0.0182(6)  | 0.0006(5)  | 0.0049(5) | 0.0001(5)  |
| N(4)  | 0.0183(7)  | 0.0151(6)  | 0.0197(6)  | 0.0012(5)  | 0.0046(5) | -0.0002(5) |
| C(a1) | 0.0199(8)  | 0.0134(7)  | 0.0181(7)  | 0.0001(5)  | 0.0035(6) | -0.0008(6) |
| C(a2) | 0.0193(8)  | 0.0162(7)  | 0.0166(7)  | 0.0016(5)  | 0.0034(6) | -0.0012(6) |
| C(a3) | 0.0220(8)  | 0.0165(7)  | 0.0225(8)  | 0.0008(6)  | 0.0095(6) | -0.0001(6) |
| C(a4) | 0.0261(9)  | 0.0163(7)  | 0.0242(8)  | -0.0008(6) | 0.0109(7) | 0.0004(6)  |
| C(a5) | 0.0189(8)  | 0.0138(7)  | 0.0173(7)  | 0.0002(5)  | 0.0036(6) | -0.0011(6) |
| C(a6) | 0.0174(8)  | 0.0158(7)  | 0.0179(7)  | 0.0015(6)  | 0.0029(6) | -0.0018(6) |
| C(a7) | 0.0173(8)  | 0.0186(7)  | 0.0163(7)  | 0.0009(6)  | 0.0034(6) | 0.0001(6)  |
| C(a8) | 0.0182(8)  | 0.0156(7)  | 0.0170(7)  | 0.0005(5)  | 0.0026(6) | 0.0020(6)  |
| C(b1) | 0.0219(8)  | 0.0142(7)  | 0.0224(8)  | 0.0008(6)  | 0.0036(6) | -0.0017(6) |
| C(b2) | 0.0201(8)  | 0.0160(7)  | 0.0186(7)  | 0.0011(6)  | 0.0033(6) | -0.0025(6) |
| C(b3) | 0.0291(10) | 0.0189(8)  | 0.0313(9)  | 0.0005(7)  | 0.0173(7) | 0.0010(7)  |
| C(b4) | 0.0328(10) | 0.0171(8)  | 0.0336(9)  | 0.0001(7)  | 0.0184(8) | 0.0015(7)  |
| C(b5) | 0.0222(8)  | 0.0146(7)  | 0.0240(8)  | 0.0002(6)  | 0.0066(6) | -0.0030(6) |
| C(b6) | 0.0205(8)  | 0.0175(7)  | 0.0225(8)  | 0.0001(6)  | 0.0049(6) | -0.0033(6) |
| C(b7) | 0.0191(8)  | 0.0201(7)  | 0.0191(7)  | -0.0001(6) | 0.0047(6) | 0.0020(6)  |
| C(b8) | 0.0189(8)  | 0.0189(7)  | 0.0192(7)  | -0.0008(6) | 0.0046(6) | 0.0027(6)  |
| C(m1) | 0.0199(8)  | 0.0159(7)  | 0.0181(7)  | 0.0017(6)  | 0.0057(6) | -0.0009(6) |
| C(m2) | 0.0218(8)  | 0.0136(7)  | 0.0189(7)  | -0.0009(6) | 0.0059(6) | 0.0004(6)  |
| C(m3) | 0.0160(8)  | 0.0188(7)  | 0.0170(7)  | 0.0019(6)  | 0.0030(6) | -0.0010(6) |
| C(m4) | 0.0201(8)  | 0.0141(7)  | 0.0164(7)  | 0.0002(5)  | 0.0023(6) | 0.0015(6)  |
| C(11) | 0.0195(8)  | 0.0121(7)  | 0.0224(8)  | 0.0004(6)  | 0.0078(6) | -0.0002(6) |
| C(12) | 0.0166(8)  | 0.0226(8)  | 0.0219(8)  | 0.0013(6)  | 0.0028(6) | -0.0023(6) |
| C(13) | 0.0214(9)  | 0.0255(8)  | 0.0178(7)  | 0.0014(6)  | 0.0033(6) | -0.0041(7) |
| C(14) | 0.0182(8)  | 0.0180(7)  | 0.0252(8)  | 0.0015(6)  | 0.0071(6) | -0.0027(6) |
| C(15) | 0.0168(8)  | 0.0227(8)  | 0.0237(8)  | 0.0018(6)  | 0.0019(6) | -0.0025(6) |
| C(16) | 0.0240(9)  | 0.0205(8)  | 0.0189(7)  | 0.0023(6)  | 0.0038(6) | -0.0002(6) |
| O(1)  | 0.0182(6)  | 0.0418(8)  | 0.0252(6)  | 0.0044(5)  | 0.0065(5) | -0.0078(5) |
| C(17) | 0.0166(9)  | 0.0332(10) | 0.0372(10) | 0.0032(8)  | 0.0047(7) | -0.0058(7) |
| C(21) | 0.0216(8)  | 0.0134(7)  | 0.0220(8)  | 0.0000(6)  | 0.0093(6) | -0.0002(6) |

**Table S11.** Continued

| atom  | $U_{11}$   | $U_{22}$   | $U_{33}$   | $U_{23}$   | $U_{13}$    | $U_{12}$   |
|-------|------------|------------|------------|------------|-------------|------------|
| C(22) | 0.0577(14) | 0.0170(8)  | 0.0218(9)  | -0.0016(7) | -0.0074(8)  | 0.0048(8)  |
| C(23) | 0.0528(13) | 0.0179(8)  | 0.0280(10) | 0.0002(7)  | -0.0117(9)  | 0.0089(8)  |
| C(24) | 0.0240(9)  | 0.0132(7)  | 0.0248(8)  | -0.0001(6) | 0.0061(6)   | 0.0004(6)  |
| C(25) | 0.0185(8)  | 0.0200(8)  | 0.0263(8)  | -0.0074(6) | 0.0021(6)   | -0.0001(6) |
| C(26) | 0.0160(8)  | 0.0192(8)  | 0.0280(9)  | -0.0031(6) | 0.0009(6)   | 0.0033(6)  |
| O(2)  | 0.0314(7)  | 0.0141(5)  | 0.0304(7)  | -0.0030(5) | -0.0010(5)  | 0.0043(5)  |
| C(27) | 0.0337(10) | 0.0190(8)  | 0.0306(9)  | -0.0065(7) | 0.0039(7)   | 0.0022(7)  |
| C(31) | 0.0188(8)  | 0.0163(7)  | 0.0224(8)  | -0.0005(6) | 0.0066(6)   | -0.0005(6) |
| C(32) | 0.0218(9)  | 0.0201(8)  | 0.0245(8)  | 0.0028(6)  | 0.0065(6)   | 0.0018(6)  |
| C(33) | 0.0326(10) | 0.0198(8)  | 0.0276(9)  | 0.0050(7)  | 0.0148(7)   | 0.0024(7)  |
| C(34) | 0.0287(10) | 0.0174(8)  | 0.0381(10) | -0.0032(7) | 0.0194(8)   | -0.0025(7) |
| C(35) | 0.0188(9)  | 0.0290(9)  | 0.0342(10) | 0.0001(7)  | 0.0082(7)   | 0.0002(7)  |
| C(36) | 0.0200(9)  | 0.0264(8)  | 0.0238(8)  | 0.0027(7)  | 0.0051(6)   | -0.0008(7) |
| O(3)  | 0.0440(8)  | 0.0172(6)  | 0.0296(7)  | -0.0020(5) | 0.0030(6)   | 0.0108(5)  |
| C(37) | 0.0395(13) | 0.0344(11) | 0.0856(18) | 0.0172(11) | 0.0440(13)  | 0.0099(9)  |
| C(41) | 0.0183(8)  | 0.0149(7)  | 0.0221(8)  | 0.0000(6)  | 0.0064(6)   | -0.0003(6) |
| C(42) | 0.0273(9)  | 0.0172(7)  | 0.0198(8)  | 0.0018(6)  | 0.0016(6)   | 0.0025(6)  |
| C(43) | 0.0316(10) | 0.0198(8)  | 0.0210(8)  | -0.0034(6) | 0.0034(7)   | 0.0027(7)  |
| C(44) | 0.0234(9)  | 0.0133(7)  | 0.0274(8)  | -0.0007(6) | 0.0050(7)   | 0.0016(6)  |
| C(45) | 0.0218(8)  | 0.0167(7)  | 0.0217(8)  | 0.0040(6)  | 0.0046(6)   | 0.0011(6)  |
| C(46) | 0.0207(8)  | 0.0180(7)  | 0.0194(7)  | 0.0001(6)  | 0.0065(6)   | 0.0001(6)  |
| O(4)  | 0.0356(8)  | 0.0289(7)  | 0.0530(9)  | 0.0085(6)  | 0.0306(7)   | 0.0034(6)  |
| C(47) | 0.0648(16) | 0.0220(9)  | 0.0386(11) | 0.0004(8)  | 0.0020(10)  | 0.0203(10) |
| N(5a) | 0.0219(9)  | 0.0198(9)  | 0.0240(8)  | 0.0020(7)  | 0.0045(7)   | -0.0008(7) |
| N(6a) | 0.0217(9)  | 0.0296(9)  | 0.0280(9)  | 0.0033(7)  | 0.0037(7)   | -0.0040(7) |
| C(1a) | 0.0244(11) | 0.0204(9)  | 0.0335(11) | -0.0001(8) | -0.0030(8)  | 0.0025(7)  |
| C(2a) | 0.0319(10) | 0.0201(8)  | 0.0249(9)  | -0.0013(7) | -0.0019(7)  | 0.0039(7)  |
| C(3a) | 0.0296(11) | 0.0168(8)  | 0.0211(9)  | -0.0002(7) | 0.0039(7)   | 0.0037(7)  |
| C(4a) | 0.0260(12) | 0.0391(13) | 0.0516(15) | 0.0022(11) | -0.0051(10) | -0.0052(9) |
| C(5a) | 0.0400(13) | 0.0366(11) | 0.0254(10) | -0.0003(8) | 0.0108(9)   | -0.0077(9) |
| N(5b) | 0.020(5)   | 0.024(6)   | 0.024(4)   | 0.000(4)   | 0.006(3)    | 0.003(4)   |
| N(6b) | 0.020(4)   | 0.019(5)   | 0.024(4)   | 0.003(4)   | 0.007(3)    | 0.005(4)   |
| C(1b) | 0.026(5)   | 0.021(5)   | 0.022(4)   | -0.004(4)  | 0.005(3)    | 0.009(4)   |
| C(2b) | 0.0319(10) | 0.0201(8)  | 0.0249(9)  | -0.0013(7) | -0.0019(7)  | 0.0039(7)  |

**Table S11.** Continued

| atom  | $U_{11}$   | $U_{22}$   | $U_{33}$   | $U_{23}$   | $U_{13}$  | $U_{12}$   |
|-------|------------|------------|------------|------------|-----------|------------|
| C(3b) | 0.024(5)   | 0.020(5)   | 0.025(4)   | 0.000(4)   | 0.003(4)  | 0.002(4)   |
| C(4b) | 0.036(6)   | 0.033(6)   | 0.026(4)   | -0.002(4)  | 0.006(4)  | 0.003(4)   |
| C(5b) | 0.031(6)   | 0.032(6)   | 0.034(5)   | -0.001(4)  | 0.007(4)  | -0.007(4)  |
| C(1S) | 0.0265(10) | 0.0285(9)  | 0.0292(9)  | 0.0035(7)  | 0.0104(7) | -0.0039(7) |
| C(2S) | 0.0358(11) | 0.0229(8)  | 0.0348(10) | 0.0006(7)  | 0.0180(8) | -0.0014(7) |
| C(3S) | 0.0452(12) | 0.0253(9)  | 0.0252(9)  | -0.0007(7) | 0.0121(8) | -0.0025(8) |
| C(4S) | 0.0363(11) | 0.0257(9)  | 0.0265(9)  | 0.0038(7)  | 0.0031(8) | -0.0013(8) |
| C(5S) | 0.0337(11) | 0.0272(9)  | 0.0289(9)  | 0.0034(7)  | 0.0078(8) | 0.0054(8)  |
| C(6S) | 0.0319(10) | 0.0310(9)  | 0.0242(9)  | -0.0009(7) | 0.0077(7) | 0.0006(8)  |
| C(7S) | 0.0261(10) | 0.0511(13) | 0.0389(11) | 0.0024(9)  | 0.0103(8) | 0.0031(9)  |

<sup>a</sup>The estimated standard deviations of the least significant digits are given in parentheses. The anisotropic displacement factor exponent takes the form:  $-2 \pi [h^2 U_{11} + \dots + 2 h k a^* b^* U_{12}]$ .

**Table S12.** Hydrogen Atom Coordinates and Equivalent Isotropic Displacement Parameters ( $\text{\AA}^2$ ) for  $[\text{Fe}(\text{Tp-OCH}_3\text{PP})(\text{Hdmpz})]^a$

| atom   | $x$     | $y$     | $z$     | $U(\text{eq})$ |
|--------|---------|---------|---------|----------------|
| H(b1)  | 0.5370  | 0.0026  | 0.2203  | 0.024          |
| H(b2)  | 0.3857  | 0.0345  | 0.2909  | 0.022          |
| H(b3)  | 0.2812  | 0.1767  | 0.3553  | 0.030          |
| H(b4)  | 0.3551  | 0.2392  | 0.3160  | 0.031          |
| H(b5)  | 0.6920  | 0.2863  | 0.1410  | 0.024          |
| H(b6)  | 0.8444  | 0.2550  | 0.0707  | 0.025          |
| H(b7)  | 0.9510  | 0.1118  | 0.0086  | 0.024          |
| H(b8)  | 0.8804  | 0.0494  | 0.0543  | 0.023          |
| H(12a) | 0.4079  | 0.0967  | 0.5111  | 0.025          |
| H(13a) | 0.2621  | 0.0820  | 0.5961  | 0.027          |
| H(15a) | 0.0204  | 0.0884  | 0.2796  | 0.026          |
| H(16a) | 0.1686  | 0.1027  | 0.1952  | 0.026          |
| H(17a) | -0.1025 | 0.0929  | 0.3959  | 0.044          |
| H(17b) | -0.1172 | 0.0616  | 0.4866  | 0.044          |
| H(17c) | -0.0729 | 0.0498  | 0.3777  | 0.044          |
| H(22a) | 0.3840  | 0.2834  | 0.0854  | 0.043          |
| H(23a) | 0.3404  | 0.3456  | 0.1153  | 0.045          |
| H(25a) | 0.5950  | 0.3465  | 0.4229  | 0.027          |
| H(26a) | 0.6349  | 0.2835  | 0.3927  | 0.027          |
| H(27a) | 0.4677  | 0.3935  | 0.4531  | 0.043          |
| H(27b) | 0.4496  | 0.4330  | 0.3855  | 0.043          |
| H(27c) | 0.5670  | 0.4093  | 0.4004  | 0.043          |
| H(32a) | 0.8345  | 0.2117  | -0.1223 | 0.027          |
| H(33a) | 0.9866  | 0.2279  | -0.1984 | 0.030          |
| H(35a) | 1.2206  | 0.1838  | 0.0873  | 0.033          |
| H(36a) | 1.0681  | 0.1688  | 0.1637  | 0.028          |
| H(37a) | 1.3516  | 0.2100  | 0.0085  | 0.072          |
| H(37b) | 1.3629  | 0.2012  | -0.1188 | 0.072          |
| H(37c) | 1.3050  | 0.1708  | -0.0540 | 0.072          |
| H(42a) | 0.6694  | 0.0097  | -0.0366 | 0.027          |
| H(43a) | 0.7339  | -0.0509 | -0.0577 | 0.030          |
| H(45a) | 0.8614  | -0.0604 | 0.2931  | 0.025          |
| H(46a) | 0.7913  | -0.0002 | 0.3131  | 0.023          |
| H(47a) | 0.9814  | -0.1002 | 0.2375  | 0.067          |

**Table S12.** Continued

| atom   | $x$    | $y$     | $z$    | $U(\text{eq})$ |
|--------|--------|---------|--------|----------------|
| H(47b) | 0.9450 | -0.1390 | 0.1684 | 0.067          |
| H(47c) | 0.8663 | -0.1220 | 0.2438 | 0.067          |
| H(6a)  | 0.8928 | 0.1731  | 0.3166 | 0.033          |
| H(2a)  | 0.9031 | 0.1634  | 0.6445 | 0.033          |
| H(4a1) | 1.1138 | 0.1676  | 0.4921 | 0.064          |
| H(4a2) | 1.0968 | 0.1938  | 0.5947 | 0.064          |
| H(4a3) | 1.0659 | 0.2097  | 0.4642 | 0.064          |
| H(5a1) | 0.6046 | 0.1572  | 0.5049 | 0.051          |
| H(5a2) | 0.6893 | 0.1331  | 0.6083 | 0.051          |
| H(5a3) | 0.6368 | 0.1147  | 0.4819 | 0.051          |
| H(6ba) | 0.6418 | 0.1266  | 0.4632 | 0.025          |
| H(2ba) | 0.9480 | 0.1698  | 0.6281 | 0.033          |
| H(4b1) | 0.6683 | 0.1424  | 0.6829 | 0.049          |
| H(4b2) | 0.8015 | 0.1473  | 0.7598 | 0.049          |
| H(4b3) | 0.7558 | 0.1072  | 0.7039 | 0.049          |
| H(5b1) | 0.9371 | 0.1636  | 0.3157 | 0.049          |
| H(5b2) | 1.0197 | 0.1807  | 0.4349 | 0.049          |
| H(5b3) | 0.9139 | 0.2052  | 0.3554 | 0.049          |
| H(2Sa) | 0.1510 | 0.0087  | 0.3874 | 0.035          |
| H(3Sa) | 0.3229 | -0.0035 | 0.5329 | 0.038          |
| H(4Sa) | 0.4673 | -0.0411 | 0.4952 | 0.037          |
| H(5Sa) | 0.4354 | -0.0682 | 0.3111 | 0.036          |
| H(6Sa) | 0.2610 | -0.0570 | 0.1659 | 0.035          |
| H(7S1) | 0.0225 | -0.0010 | 0.1984 | 0.058          |
| H(7S2) | 0.0463 | -0.0359 | 0.1238 | 0.058          |
| H(7S3) | 0.0989 | 0.0047  | 0.1100 | 0.058          |

<sup>a</sup> $U(\text{eq})$  is defined as one third of the trace of the orthogonalized  $\mathbf{U}_{ij}$  tensor the estimated standard deviations of the least significant digits are given in parentheses.



**Table S13.** Mössbauer Parameters for [Fe(TPP)(Hdmpz)] at variable temperatures.

| Complex          | $\Delta E_Q$ , mm/s | $\delta_{\text{Fe}}$ , mm/s | $T$ , K | M    | ref. |
|------------------|---------------------|-----------------------------|---------|------|------|
| [Fe(TPP)(Hdmpz)] | 1.86                | 0.78                        | 298     | 500G | tw   |
|                  | 2.03                | 0.82                        | 250     | 500G |      |
|                  | 2.20                | 0.85                        | 200     | 500G |      |
|                  | 2.31                | 0.87                        | 150     | 500G |      |
|                  | 2.41                | 0.89                        | 100     | 500G |      |
|                  | 2.47                | 0.90                        | 50      | 500G |      |
|                  | 2.51                | 0.90                        | 20      | 500G |      |
|                  | 2.54                | 0.91                        | 16      | 500G |      |

**Table S14.** Fits for applied field Mössbauer measurements.

| Complex                     | Fe(TPP)(Hdmpz) |
|-----------------------------|----------------|
| D, cm <sup>-1</sup>         | 9.4            |
| E/D                         | 0.29           |
| $\Delta E_Q$ , mm/s         | -2.54          |
| $\eta$                      | 0.74           |
| $\delta_{\text{Fe}}$ , mm/s | 0.91           |
| $A_{xx}^*/g_N^*\beta_N$ , T | -6.8           |
| $A_{yy}^*/g_N^*\beta_N$ , T | -6.8           |
| $A_{zz}^*/g_N^*\beta_N$ , T | -2.2           |
| $\alpha^a$                  | -58            |
| $\beta^a$                   | 36             |
| $\gamma^a$                  | 31             |

<sup>a</sup> Euler angles for rotation of the electric field gradient with respect to the g tensor.

See Tinkham, M. "Group Theory and Quantum Mechanics," McGraw-Hill Book Company, New York, NY, 1964, p102.

**Table S15.** Out-of-Plane Displacements ( $\text{\AA}$ ) of the Minimal Basis for the X-ray Crystal Structures of Five-Coordinate High-Spin Iron(II) Porphyrinates

| porphyrin                           | Doop <sup>a</sup> | $\delta_{\text{oop}}^b$ | sad    | ruf    | dom    | wav(x) | wav(y) | pro    | $\Delta\text{N}_4^c$ | $\Delta^d$ | ref |
|-------------------------------------|-------------------|-------------------------|--------|--------|--------|--------|--------|--------|----------------------|------------|-----|
| [Fe(TPP)(Hdmpz)]                    | 0.243             | 0.010                   | -0.042 | -0.051 | 0.199  | 0.031  | 0.1208 | -0.003 | 0.32                 | 0.38       | tw  |
| [Fe(Tp-OCH <sub>3</sub> PP)(Hdmpz)] | 0.165             | 0.011                   | 0.030  | 0.034  | -0.102 | -0.081 | 0.090  | 0.010  | 0.31                 | 0.34       | tw  |

<sup>a</sup> Observed total distortion. <sup>b</sup> The mean deviation as a measure of the goodness-of-fit. <sup>c</sup> Displacement of iron from the mean plane of the four pyrrole nitrogen atoms. <sup>d</sup> Displacement of iron from the 24-atom mean plane
